# Supplementary material
Source: publisher figshare collection journal article supplement (https://springernature.figshare.com/ndownloader/files/13103291)
Supplement: Supplementary file 1 [file 13103291]

## Sheet: Bibliographic searches
Citation origin (B: backward, F: forward citation search)	Citation	Duplicate?	New article?	ID (for previously screened articles)	Include at title	Include at abstract	Include at full-text	Full text unavailable	Full-text not in English	Abstract	URL
Álvarez‐Romero et al., 2013 B	Ardron JA, Possingham H, Klein C. 2008. Marxan Good Practices Handbook. Pacific Marine Analysis and Research Association: Vancouver, BC. Arriaga-Cabrera L, Vázquez-Domínguez E, González-Cano J, Jiménez-Rosenberg R, Muñoz-López E, Aguilar-Sierra V.	D	1		Y	N				Marxan is software that delivers decision support for reserve system design. Marxan was initially designed to solve a particular class of reserve design problems known as the minimum set problem (see Box 1.1) where the goal is to achieve some minimum representation of biodiversity features for the smallest possible cost. Marxan helps users to determine the possible contribution of individual area…
Álvarez‐Romero et al., 2013 B	Bezaury-Creel JE. 2005. Protected areas and coastal and ocean management in México. Ocean & Coastal Management 48: 1016–1046.		1		Y	Y	N - Exclude on intervention, outcomes, comparator and study design			No explicit “integrated coastal and ocean management” policy or program has been formally instituted to manage coastal and marine issues in México. Nevertheless two existing environmental policy tools: ecological zoning programs and coastal and marine protected areas, which have incorporated interagency and multi-stakeholder participation within their design, are currently being used in lieu of s…	https://www.sciencedirect.com/science/article/pii/S0964569105000463
Álvarez‐Romero et al., 2013 B	Enríquez-Andrade R, Anaya-Reyna G, Barrera-Guevara JC, C-M MdlÁ, Martínez-Delgado ME, Vaca-Rodríguez J, Valdés-Casillas C. 2005. An analysis of critical areas for biodiversity conservation in the Gulf of California Region. Ocean & Coastal Management 48: 31–50.		1		Y	Y	N - Exclude on intervention, outcomes, comparator and study design			This article summarizes the results of a broad regional consulting process aimed to identify critical areas for biodiversity conservation and to determine the relative level of anthropogenic pressure on natural resources throughout the Gulf of California Region. The methodology was designed to achieve broad consensus by means of a highly participative process that involved the following: (1) the …	https://www.sciencedirect.com/science/article/pii/S0964569105000141
Álvarez‐Romero et al., 2013 B	Gleason M, McCreary S, Miller-Henson M, Ugoretz J, Fox E, Merrifield M, McClintock W, Serpa P, Hoffman K. 2010. Science-based and stakeholder-driven marine protected area network planning: a successful case study from north central California. Ocean and Coastal Management		1		Y	Y	N - Exclude on intervention, outcomes, comparator and study design			The planning process for California's Marine Life Protection Act in north central California represents a case study in the design of a regional component of a statewide network of marine protected areas (MPAs) for improved ecosystem protection. We describe enabling factors, such as a legislative mandate, political will, and adequate capacity and funding that fostered a successful planning proces…	https://www.sciencedirect.com/science/article/pii/S0964569109001513
Álvarez‐Romero et al., 2013 B	Lundquist CJ, Granek EF. 2005. Strategies for successful marine conservation: integrating socioeconomic, political, and scientific factors. Conservation Biology 19: 1771–1778.		1		Y	Y	N - Exclude on intervention, outcomes, comparator and study design			As the process of marine-protected-area design and implementation evolves, the incorporation of new tools will advance our ability to create and maintain effective protected areas. We reviewed characteristics and approaches that contribute to successful global marine conservation efforts. One successful characteristic emphasized in most case studies is the importance of incorporating stakeholders…	http://onlinelibrary.wiley.com/doi/10.1111/j.1523-1739.2005.00279.x/abstract
Álvarez‐Romero et al., 2013 B	Morgan L, Maxwell S, Tsao F, Wilkinson TAC, Etnoyer P. 2005. Marine priority conservation areas: Baja California to the Bering Sea. Commission for Environmental Cooperation of North America and the Marine Conservation Biology Institute: Montreal, Quebec, Canada.		1		Y	Y	N - Exclude on intervention, outcomes, comparator and study design			From the Gulf of California, with its deep canyons, nutrient-rich upwellings and high levels of endemism, to the 20,000 kilometers of bays, inlets and inland drainage systems of the Pacific Northwest and the high productivity of the Bering Sea, the west coast of North America is home to unique and important shared marine environments. It is also home to a great number of shared marine species—suc…	http://www3.cec.org/islandora/en/item/2201-marine-priority-conservation-areas-baja-california-bering-sea-en.pdf
Álvarez‐Romero et al., 2013 B	Gilliland PM, Laffoley D. 2008. Key elements and steps in the process of developing ecosystem-based marine spatial planning. Marine Policy 32: 787–796.		1		Y	Y	N - Exclude on subject, intervention, outcomes, comparator and study design			Marine spatial planning (MSP) is an essential tool for delivering an Ecosystem Approach and should add value to existing management measures for the marine environment. It should be based on a clear set of principles with a sustainable development purpose. Developing MSP can draw selectively on extensive experiences in terrestrial land use planning. A nested approach with appropriate planning act…	https://www.sciencedirect.com/science/article/pii/S0308597X08000675
Álvarez‐Romero et al., 2013 B	Groves CR, Jensen DB, Valutis LL, Redford KH, Shaffer ML, Scott JM, Baumgartner JV, Higgins JV, Beck MW, Anderson MG. 2002. Planning for biodiversity conservation: Putting conservation science into practice. Bioscience 52: 499–512.		1		Y	Y	N - Exclude on subject, intervention, outcomes, comparator and study design			The growing recognition that the species extinction crisis has deepened and that there are limited conservation dollars to address this crisis has had a profound influence on the planning methods and conservation strategies of governmental and nongovernmental organizations. For example, World Wildlife Fund (WWF) and Conservation International have pinpointed priority ecoregions and biodiversity “…	https://academic.oup.com/bioscience/article/52/6/499/240341
Álvarez‐Romero et al., 2013 B	Pomeroy R, Douvere F. 2008. The engagement of stakeholders in the marine spatial planning process. Marine Policy 32: 816–822. Pressey RL, Bottrill MC. 2008. Opportunism, threats, and the evolution of systematic conservation planning. Conservation		1		Y	Y	N - Exclude on subject, intervention, outcomes, comparator and study design			Due to the interdependency that exists between the ecosystem resources and its users, successful implementation of ecosystem-based management depends on the identification and understanding of different stakeholders, their practices, expectations and interests. Today, many scientists and resource managers agree that the involvement of stakeholders is a key factor for a successful management regim…	https://www.sciencedirect.com/science/article/pii/S0308597X08000705
Álvarez‐Romero et al., 2013 B	Arriaga-Cabrera L, Vázquez-Domínguez E, González-Cano J, Jiménez-Rosenberg R, Muñoz-López E, Aguilar-Sierra V. 1998. Regiones marinas prioritarias de México. Comisión Nacional para el Conocimiento y uso de la Biodiversidad (CONABIO): Mexico, DF.		1		Y	Y			1		http://www.conabio.gob.mx/conocimiento/regionalizacion/doctos/marinas.html
Álvarez‐Romero et al., 2013 B	INE. 2005. Evaluacion preliminar de las tasas de perdida de la superficie de manglar en Mexico. Instituto Nacional de Ecologıa, SEMARNAT: Mexico, DF.		1		Y	Y			1		https://www.agua.org.mx/wp-content/uploads/2010/11/233_informe_manglar.pdf
Álvarez‐Romero et al., 2013 B	Ulloa R, Torre J, Bourillón L, Gondor A, Alcantar N. 2006. Planeación ecorregional para la conservación marina: Golfo de California y costa occidental de Baja California Sur. Informe final a The Nature Conservancy. Comunidad y Biodiversidad: A.C., Guaymas, Mexico.		1		Y	Y			1		http://cobi.org.mx/wp-content/uploads/2012/08/2006-t-Reporte_final_EGCYPBCS_mayo.pdf
Álvarez‐Romero et al., 2013 B	Enríquez-Andrade R, Danemann G. 1998. Identificación y establecimiento de prioridades para las acciones de conservación y oportunidades de uso sustentable de los recursos marinos y costeros de la Península de Baja California. Reporte técnico de proyecto. Pronatura Península de Baja		1		Y	Y		1
Álvarez‐Romero et al., 2013 B	Aburto-Oropeza O, Lopez-Sagastegui C. 2006. A marine reserve network for the Gulf of California the next step in conserving the world’s aquarium. Greenpeace, Mexico, D.F.		1		Y	N				Life abounds in the Gulf of California.This wonderful sea shelters some of the richest fisheries in the world, contains more than thirty species of marine mammals, and sustains the northernmost coral reefs in the American Continent. Immense coastal surges bring nutrients from the depths of the Gulf to the surface, and fertilize some of the richest oceanic waters in the world.The estuaries bring n…	https://www.greenpeace.org/sweden/Global/sweden/p2/hav/report/2006/a-marine-reserve-network-for-t.pdf
Álvarez‐Romero et al., 2013 B	Baker N, Beger M, McClennen C, Ishoda A, Edwards F. 2011. Reimaanlok: a national framework for conservation area planning in the Marshall Islands. Journal of Marine Biology 2011: 1–11.		1		Y	N				The development of Reimaanlok, a national framework for the planning and establishment of community-based conservation areas in the Marshall Islands, is outlined. A team composed of international experts and local resource management professionals selected and modified an ecoregional planning approach, defined key concepts, selected conservation features and targets, compiled biogeographical info…	https://www.hindawi.com/journals/jmb/2011/273034/
Álvarez‐Romero et al., 2013 B	Cudney-Bueno R, Lavín MF, Marinone SG, Raimondi PT, Shaw WW. 2009. Rapid effects of marine reserves via larval dispersal. PloS One 4: e4140.		1		Y	N				Marine reserves have been advocated worldwide as conservation and fishery management tools. It is argued that they can protect ecosystems and also benefit fisheries via density-dependent spillover of adults and enhanced larval dispersal into fishing areas. However, while evidence has shown that marine reserves can meet conservation targets, their effects on fisheries are less understood. In parti…	http://journals.plos.org/plosone/article?id=10.1371/journal.pone.0004140
Álvarez‐Romero et al., 2013 B	Day JC. 2002. Zoning - lessons from the Great Barrier Reef Marine Park. Ocean & Coastal Management 45: 139–156.		1		Y	N				The Great Barrier Reef Marine Park (GBRMP) is bigger than the United Kingdom, Holland and Switzerland combined. Over the last 25 years a range of management ‘tools’, including zoning plans, permits, education, and more recently management plans, have been applied to regulate access and to control and mitigate impacts associated with human use of the GBRMP. A multiple-use zoning approach provides …	https://www.sciencedirect.com/science/article/pii/S0964569102000522
Álvarez‐Romero et al., 2013 B	Ezcurra E, Aburto-Oropeza O, C-M MdlÁ, Cudney-Bueno R, Torre J. 2009. Gulf of California, Mexico. In Ecosystem-based Management for the Oceans, McLeod K, Leslie H (eds). Island Press: Washington, DC; 227–252.		1		Y	N					https://islandpress.org/book/ecosystem-based-management-for-the-oceans
Álvarez‐Romero et al., 2013 B	Fernandes L, Day J, Kerrigan B, Breen D, De’ath G, Mapstone B, Coles R, Done T, Marsh H, Poiner I, et al. 2009. A process to design a network of marine no-take areas: Lessons from the Great Barrier Reef. Ocean and Coastal Management 52: 439–447.		1		Y	N				In the absence of consensus on the quantity and level of zoning protection required for coral reef and lagoon ecosystems, which process can guide decision makers? The Great Barrier Reef Marine Park Authority (GBRMPA) worked with experts in a collaborative process to develop a set of Biophysical Operational Principles to guide the design of a network of no-take areas. First, 82 expert scientists w…	https://www.sciencedirect.com/science/article/pii/S096456910900060X
Álvarez‐Romero et al., 2013 B	Leslie HM, McLeod KL. 2007. Confronting the challenges of implementing marine ecosystem-based management. Frontiers in Ecology and the Environment 5: 540–548.		1		Y	N				Many services provided by coastal and marine ecosystems are in decline. Awareness of these declines and the need to improve existing management has led to a shift toward ecosystem-based approaches to marine management and conservation, both in the US and elsewhere. Marine ecosystem-based management (EBM) involves recognizing and addressing interactions among different spatial and temporal scales,…	http://onlinelibrary.wiley.com/doi/10.1890/060093/abstract
Álvarez‐Romero et al., 2013 B	McLeod E, Salm R, Green A, Almany J. 2009. Designing marine protected area networks to address the impacts of climate change. Frontiers in Ecology and the Environment 7: 362–370.		1		Y	N				Principles for designing marine protected area (MPA) networks that address social, economic, and biological criteria are well established in the scientific literature. Climate change represents a new and serious threat to marine ecosystems, but, to date, few studies have specifically considered how to design MPA networks to be resilient to this emerging threat. Here, we compile the best available…	http://onlinelibrary.wiley.com/doi/10.1890/070211/abstract
Álvarez‐Romero et al., 2013 B	Rife AN, Erisman B, Sanchez A, Aburto-Oropeza O. 2012. When good intentions are not enough . . . insights on networks of “paper park” marine protected areas. Conservation Letters doi: 10.1111/j.1755-263X.2012.00303.x.		1		Y	N				In efforts to protect the world's oceans, the Convention on Biological Diversity has moved the goal of establishing marine protected areas (MPAs) to cover 10% of the ocean from 2012 to 2020. This adjustment suggests that the rush to establish MPAs without proper resources does not resolve conservation problems. In fact, such actions may create a false sense of protection that camouflages degradat…	http://onlinelibrary.wiley.com/doi/10.1111/j.1755-263X.2012.00303.x/abstract
Álvarez‐Romero et al., 2013 B	Roberts CM, Halpern BS, Palumbi SR, Warner RR. 2001. Designing marine reserve networks: why small, isolated protected areas are not enough. Conservation Biology in Practice 2: 11–17. Roberts CM, McClean CJ, Veron JEN, Hawkins JP, Allen		1		Y	N					http://onlinelibrary.wiley.com/doi/10.1111/j.1526-4629.2001.tb00012.x/abstract
Álvarez‐Romero et al., 2013 B	Aburto-Oropeza O, Erisman B, Caso M, Ezcurra E. 2010a. Log of the Deep Sea: An Expedition to the Seamounts of the Sea of Cortes. Instituto Nacional de Ecologia: Mexico, DF. Aburto-Oropeza O, Paredes G, Mascareñas-Osorio I, Sala E. 2010b. Climatic influence on reef fish recruitment and		1		N
Álvarez‐Romero et al., 2013 B	Aburto-Oropeza O, Ezcurra E, Danemann G, Valdez V, Murray J, Sala E. 2008. Mangroves in the Gulf of California increase fishery yields. Proceedings of the National Academy of Sciences of the United States of America 105: 10456–10459.		1		N
Álvarez‐Romero et al., 2013 B	Aburto-Oropeza O, Paredes G, Mascareñas-Osorio I, Sala E. 2010b. Climatic influence on reef fish recruitment and fisheries. Marine Ecology Progress Series 410: 283–287. Airame S, Dugan JE, Lafferty KD, Leslie H, McArdle DA, Warner RR. 2003. Applying ecological criteria to marine		1		N
Álvarez‐Romero et al., 2013 B	All JD. 2006. Colorado river floods, droughts, and shrimp fishing in the upper Gulf of California, Mexico. Environmental Management 37: 111–125.		1		N
Álvarez‐Romero et al., 2013 B	Ball I, Possingham H, Watts DJ. 2009. Marxan and relatives: software for spatial conservation prioritization. In Spatial Conservation Prioritization Quantitative Methods and Computational Tools, Moilanen A, Wilson K, Possingham H (eds). Oxford University Press: Oxford; 185–195.		1		N
Álvarez‐Romero et al., 2013 B	Barbier EB, Hacker SD, Kennedy C, Koch EW, Stier AC, Silliman BR. 2010. The value of estuarine and coastal ecosystem services. Ecological Monographs 81: 169–193. Beger M, Linke S, Watts M, Game E, Treml E, Ball I, Possingham HP. 2010. Incorporating asymmetric		1		N
Álvarez‐Romero et al., 2013 B	Beger M, Linke S, Watts M, Game E, Treml E, Ball I, Possingham HP. 2010. Incorporating asymmetric connectivity into spatial decision making for conservation. Conservation Letters 3: 359–368.		1		N
Álvarez‐Romero et al., 2013 B	Beman JM, Arrigo KR, Matson PA. 2005. Agricultural runoff fuels large phytoplankton blooms in vulnerable areas of the ocean. Nature 434: 211–214.		1		N
Álvarez‐Romero et al., 2013 B	Brusca R, Findley LT, Hastings PA, Hendrickx ME, Cosio JT, van der Heiden AM, Cartron J, Ceballos G, Felger R. 2005. Macrofaunal diversity in the Gulf of California. In Biodiversity, Ecosystems, and Conservation in Northern Mexico, Cartron J, Ceballos G, Felger R (eds). Oxford University Press: New York; 179–203.		1		N
Álvarez‐Romero et al., 2013 B	Carriquiry JD, Sánchez A. 1999. Sedimentation in the Colorado River delta and Upper Gulf of California after nearly a century of discharge loss. Marine Geology 158: 125–145.		1		N
Álvarez‐Romero et al., 2013 B	Erisman B, Mascarenas I, Paredes G, de Mitcheson YS, Aburto-Oropeza O, Hastings P. 2010. Seasonal, annual, and long-term trends in commercial fisheries for aggregating reef fishes in the Gulf of California, Mexico. Fisheries Research 106: 279–288.		1		N
Álvarez‐Romero et al., 2013 B	Galindo-Reyes JG, Villagrana LC, Lazcano-Alvarez G. 1999. Environmental conditions and pesticide pollution of two coastal ecosystems in the Gulf of California, Mexico. Ecotoxicology and Environmental Safety 44: 280–286. Game ET, Grantham HS, Hobday AJ, Pressey RL, Lombard		1		N
Álvarez‐Romero et al., 2013 B	Game ET, Grantham HS, Hobday AJ, Pressey RL, Lombard AT, Beckley LE, Gjerde K, Bustamante R, Possingham HP, Richardson AJ. 2009. Pelagic protected areas: the missing dimension in ocean conservation. Trends in Ecology		1		N
Álvarez‐Romero et al., 2013 B	García-Hernández J, Cadena-Cárdenas L, Betancourt-Lozano M, García-De-La-Parra LM, García-Rico L, Márquez-Farías F. 2007. Total mercury content found in edible tissues of top predator fish from the Gulf of California, Mexico. Toxicological and Environmental Chemistry 89: 507–522.		1		N
Álvarez‐Romero et al., 2013 B	Glenn EP, Nagler PL, Brusca RC, Hinojosa-Huerta O. 2006. Coastal wetlands of the northern Gulf of California: inventory and conservation status. Aquatic Conservation: Marine and Freshwater Ecosystems 16: 5–28. Glover AG, Smith CR. 2003. The deep-sea floor ecosystem:		1		N
Álvarez‐Romero et al., 2013 B	Glover AG, Smith CR. 2003. The deep-sea floor ecosystem: current status and prospects of anthropogenic change by the year 2025. Environmental Conservation 30: 219–241. Granek EF, Polasky S, Kappel CV, Reed DJ, Stoms DM, Koch EW, Kennedy CJ, Cramer LA, Kacker SD, Barbier		1		N
Álvarez‐Romero et al., 2013 B	Granek EF, Polasky S, Kappel CV, Reed DJ, Stoms DM, Koch EW, Kennedy CJ, Cramer LA, Kacker SD, Barbier EB, et al. 2010. Ecosystem services as a common language for coastal ecosystem-Based Management. Conservation Biology 24: 207–216.		1		N
Álvarez‐Romero et al., 2013 B	Gutierrez-Galindo EA, Flores Munoz G, Ortega Garcia ML, Villaescusa Celaya JA. 1992. Pesticides in coastal waters of the Gulf of California: Mussel Watch Program 1987–1988. Pesticidas en las aguas costeras del Golfo de California: Programa de Vigilancia con Mejillon 1987–1988 18: 77–99.		1		N
Álvarez‐Romero et al., 2013 B	Hidalgo-González RM, Alvarez-Borrego S. 2011. Total and new production in the Gulf of California estimated from ocean color data from the satellite sensor SeaWIFS. Deep Sea Research Part II: Topical Studies in Oceanography 51: 739–752.		1		N
Álvarez‐Romero et al., 2013 B	Howarth RW. 2008. Coastal nitrogen pollution: a review of sources and trends globally and regionally. Harmful Algae 8: 14–20. INE. 2005. Evaluacion preliminar de las tasas de perdida de la superficie de manglar en Mexico. Instituto Nacional de		1		N
Álvarez‐Romero et al., 2013 B	Jaramillo-Legorreta A, Rojas-Bracho L, Brownell Jr RL, Read AJ, Reeves RR, Ralls K, Taylor BL. 2007. Saving the vaquita: immediate action, not more data. Conservation Biology 21: 1653–1655		1		N
Álvarez‐Romero et al., 2013 B	Lavín M, Marinone S. 2003. An overview of the physical oceanography of the Gulf of California. In Nonlinear Processes in Geophysical Fluid Dynamics, Velasco OU, Sheinbaum J, Ochoa J (eds). Kluwer Academia Publishers: Dordrecht, Holland; 173–204.		1		N
Álvarez‐Romero et al., 2013 B	Lester SE, Halpern BS, Grorud-Colvert K, Lubchenco J, Ruttenberg BI, Gaines SD, Airame S, Warner RR. 2009. Biological effects within no-take marine reserves: a global synthesis. Marine Ecology Progress Series 384: 33–46. Lluch-Cota SE, Aragon-Noriega EA, Arreguin-Sanchez F,		1		N
Álvarez‐Romero et al., 2013 B	Lluch-Cota SE, Aragon-Noriega EA, Arreguin-Sanchez F, Aurioles-Gamboa D, Bautista-Romero JJ, Brusca RC, Cervantes-Duarte R, Cortes-Altamirano R, Del-Monte-Luna P, Esquivel-Herrera A, et al. 2007. The Gulf of California: review of ecosystem status and sustainability challenges.		1		N
Álvarez‐Romero et al., 2013 B	Lluch-Cota SE, Parés-Sierra A, Magaña-Rueda VO, Arreguín-Sánchez F, Bazzino G, Herrera-Cervantes H, Lluch-Belda D. 2010. Changing climate in the Gulf of California. Progress in Oceanography 87: 114–126.		1		N
Álvarez‐Romero et al., 2013 B	Lugo-Hubp J, Fernandez Córdova C. 1990. Geomorfología Marina. Obtenido de Geomorfología 1. IV.3.3., Atlas Nacional de México, Vol. II, Escala 1:4000000. Instituto de Geografía, UNAM: Mexico, DF. Lundquist CJ, Granek EF. 2005. Strategies for successful		1		N
Álvarez‐Romero et al., 2013 B	Marinone SG, Ulloa MJ, Parés-Sierra A, Lavín MF, Cudney-Bueno R. 2008. Connectivity in the northern Gulf of California from particle tracking in a three-dimensional numerical model. Journal of Marine Systems 71: 149–158.		1		N
Álvarez‐Romero et al., 2013 B	Mora C, Myers RA, Coll M, Libralato S, Pitcher TJ, Sumaila RU, Zeller D, Watson R, Gaston KJ, Worm B. 2009. Management effectiveness of the world’s marine fisheries. PLoS Biology 7: e1000131. Morgan L, Maxwell S, Tsao F, Wilkinson TAC, Etnoyer P.		1		N
Álvarez‐Romero et al., 2013 B	Niño-Torres CA, Zenteno-Savín T, Gardner SC, Urbán RJ. 2010. Organochlorine pesticides and polychlorinated biphenyls in fin whales (Balaenoptera physalus) from the Gulf of California. Environmental Toxicology 25: 381–390. Olson DM, Dinerstein E. 2002. The Global 200: priority		1		N
Álvarez‐Romero et al., 2013 B	Olson DM, Dinerstein E. 2002. The Global 200: priority ecoregions for global conservation. Annals of the Missouri Botanical Garden 89: 199–224. Ortiz-Lozano L, Gutiérrez-Velázquez AL, Granados-Barba A. 2009. Marine and terrestrial protected areas in Mexico:		1		N
Álvarez‐Romero et al., 2013 B	Ortiz-Lozano L, Gutiérrez-Velázquez AL, Granados-Barba A. 2009. Marine and terrestrial protected areas in Mexico: Importance of their functional connectivity in conservation management. Ocean and Coastal Management 52: 620–627. Osmond M, Airame S, Caldwell M, Day J. 2010. Lessons		1		N
Álvarez‐Romero et al., 2013 B	Páez-Osuna F, Ruiz-Fernández AC. 2005. Environmental load of nitrogen and phosphorus from extensive, semiintensive, and intensive shrimp farms in the Gulf of California ecoregion. Bulletin of Environmental Contamination and Toxicology 74: 681–688.		1		N
Álvarez‐Romero et al., 2013 B	Rebman JP, De La Luz JLL, Moran RV. 2002. Vascular plants of the Gulf islands. In A New Island Biogeography of the Sea of Cortes, Case TJ, Cody ML, Ezcurra E (eds). Oxford University Press: New York; 465–511.		1		N
Álvarez‐Romero et al., 2013 B	Rowell K, Flessa KW, Dettman DL, Román MJ, Gerber LR, Findley LT. 2008. Diverting the Colorado River leads to a dramatic life history shift in an endangered marine fish. Biological Conservation 141: 1138–1148.		1		N
Álvarez‐Romero et al., 2013 B	Sala E, Aburto-Oropeza O, Reza M, Paredes G, López-Lemus LG. 2004. Fishing down coastal food webs in the Gulf of California. Fisheries 29: 19–25.		1		N
Álvarez‐Romero et al., 2013 B	Sala E, Knowlton N. 2006. Global marine biodiversity trends. Annual Review of Environment and Resources 31: 93–122. Sala E, Aburto-Oropeza O, Paredes G, Parra I, Barrera JC, Dayton PK. 2002. A general model for designing networks		1		N
Álvarez‐Romero et al., 2013 B	Silvestri S, Kershaw F. 2010. Framing the flow: innovative approaches to understand, protect and value ecosystem services across linked habitats. UNEP World Conservation Monitoring Centre: Cambridge, UK.		1		N
Álvarez‐Romero et al., 2013 B	Spalding M, Wood LJ, Fitzgerald C, Gjerde K. 2010. The 10% target: where do we stand? In Global Ocean Protection: Present Status and Future Possibilities. Toropova C, Meliane I, Laffoley D, Matthews E, Spalding M (eds). Agence des aires marines protégées. Brest, France:; IUCN WCPA;		1		N
Álvarez‐Romero et al., 2013 B	Stillman JH. 2003. Acclimation capacity underlies susceptibility to climate change. Science 301: 65. Tallis H, Polasky S. 2009. Mapping and valuing ecosystem services as an approach for conservation and natural-resource management. Annals of the New York Academy of Sciences		1		N
Álvarez‐Romero et al., 2013 B	Tallis H, Polasky S. 2009. Mapping and valuing ecosystem services as an approach for conservation and natural-resource management. Annals of the New York Academy of Sciences 1162: 265–283. Tallis H, Ferdana Z, Gray E. 2008. Linking terrestrial		1		N
Álvarez‐Romero et al., 2013 B	UNEP-WCMC. 2010. Coral Reefs of the World. World Conservation Monitoring Centre, United Nations Environmental Program (UNEP-WCMC): Cambridge, UK.		1		N
Álvarez‐Romero et al., 2013 B	Velarde E, Ezcurra E, Cisneros-Mata MA, LavÍn MF. 2004. Seabird ecology, El Niño anomalies, and prediction of sardine fisheries in the Gulf of California. Ecological Applications 14: 607–615. Visser H, de Nijs T. 2006. The Map Comparison Kit.		1		N
Álvarez‐Romero et al., 2013 B	Visser H, de Nijs T. 2006. The Map Comparison Kit. Environmental Modelling and Software 21: 346–358. Visser H. (Ed.), 2004. The MAP COMPARISON KIT: methods, software and applications. RIVM report 550002005. Available from http://www.rivm.nl/milieu/		1		N
Álvarez‐Romero et al., 2013 B	Webb TJ, Vanden Berghe E, O’Dor R. 2010. Biodiversity’s big wet secret: the global distribution of marine biological records reveals chronic under-exploration of the deep pelagic ocean. PloS One 5: e10223. Weeks R, Russ GR, Alcala AC, White AT. 2010a.		1		N
Álvarez‐Romero et al., 2013 B	Wilson KA, McBride MF, Bode M, Possingham HP. 2006. Prioritizing global conservation efforts. Nature 440: 337–340. Wilson KA, Underwood EC, Morrison SA, Klausmeyer KR, Murdoch WW, Reyers B, Wardell-Johnson G, Marquet PA,		1		N
Álvarez‐Romero et al., 2013 B	Wood LJ, Fish L, Laughren J, Pauly D. 2008. Assessing progress towards global marine protection targets: shortfalls in information and action. Oryx 42: 340–351. Worm B, Barbier EB, Beaumont N, Duffy JE, Folke C, Halpern BS, Jackson JBC, Lotze HK, Micheli F, Palumbi		1		N
Álvarez‐Romero et al., 2013 B	Worm B, Barbier EB, Beaumont N, Duffy JE, Folke C, Halpern BS, Jackson JBC, Lotze HK, Micheli F, Palumbi SR, et al. 2006. Impacts of biodiversity loss on ocean ecosystem services. Science 314: 787–790. Worm B, Hilborn R, Baum JK, Branch TA, Collie JS,		1		N
Álvarez‐Romero et al., 2013 B	Worm B, Hilborn R, Baum JK, Branch TA, Collie JS, Costello C, Fogarty MJ, Fulton EA, Hutchings JA, Jennings S, et al. 2009. Rebuilding global fisheries. Science 325: 578–585. MARINE CONSERVATION PLANNING IN PRACTICE 505		1		N
Álvarez‐Romero et al., 2013 B	CEC. 2006. Ecological Regions of North America: Toward a Common Perspective - Update. Commission for Environmental Cooperation: Montreal, Quebec, Canada.		1		N
Álvarez‐Romero et al., 2013 B	Chan KMA, Ruckelshaus M. 2010. Characterizing changes in marine ecosystem services. F1000 Biology Reports 2.		1		N
Álvarez‐Romero et al., 2013 B	CONABIO. 2008. Distribución de los manglares de México. Escala 1:50 000. Extraído del proyecto DQ056: Programa de monitoreo de los manglares de México a largo plazo, primera etapa. Comisión Nacional para el Conocimiento y Uso de la Biodiversidad: Mexico, DF.		1		N
Álvarez‐Romero et al., 2013 B	Bottrill MC, Mills M, Pressey RL, Game ET, Groves C. 2012. Evaluating perceived benefits of ecoregional assessments. Conservation Biology 26: 851–861. Brusca R, Findley LT, Hastings PA, Hendrickx ME, Cosio JT, van der Heiden AM, Cartron J, Ceballos G, Felger R. 2005.	D		33026202	Y	Y	N - Exclude on comparator
Álvarez‐Romero et al., 2013 B	Margules CR, Pressey RL. 2000. Systematic conservation planning. Nature 405: 243–253. Marinone SG, Ulloa MJ, Parés-Sierra A, Lavín MF, Cudney-Bueno R. 2008. Connectivity in the northern Gulf of California from particle tracking in a three-dimensional	D		27938573	Y	N
Álvarez‐Romero et al., 2013 B	Roberts CM, McClean CJ, Veron JEN, Hawkins JP, Allen GR, McAllister DE, Mittermeier CG, Schueler FW, Spalding M, Wells F, et al. 2002. Marine biodiversity hotspots and conservation priorities for tropical reefs. Science 295: 1280–1284.	D		27938411	Y	N
Álvarez‐Romero et al., 2013 B	Leslie HM. 2005. Synthesis of marine conservation planning approaches. Conservation Biology 19: 1701–1713. Leslie HM, McLeod KL. 2007. Confronting the challenges of implementing marine ecosystem-based management. Frontiers in Ecology and the Environment 5: 540–548.			27951041	Y	Y	N - exclude as a review
Álvarez‐Romero et al., 2013 B	Fernandes L, Day J, Lewis A, Slegers S, Kerrigan B, Breen D, Cameron D, Jago B, Hall J, Lowe D, et al. 2005. Establishing representative no-take areas in the Great Barrier Reef: Large-scale implementation of theory on marine protected areas. Conservation Biology 19: 1733–1744.			27930855	Y	Y	N - Exclude on comparator
Álvarez‐Romero et al., 2013 B	Game ET, Lipsett-Moore G, Hamilton R, Peterson N, Kereseka J, Atu W, Watts M, Possingham H. 2011. Informed opportunism for conservation planning in the Solomon Islands. Conservation Letters 4: 38–46. García-Hernández J, Cadena-Cárdenas L, Betancourt-Lozano M,			27951142	Y	Y	N - Exclude on comparator and study design
Álvarez‐Romero et al., 2013 B	Osmond M, Airame S, Caldwell M, Day J. 2010. Lessons for marine conservation planning: A comparison of three marine protected area planning processes. Ocean and Coastal Management 53: 41–51. Páez-Osuna F, Ruiz-Fernández AC. 2005. Environmental load			27954487	Y	Y	N - Exclude on comparator and study design
Álvarez‐Romero et al., 2013 B	Grantham HS, Game ET, Lombard AT, Hobday AJ, Richardson AJ, Beckley LE, Pressey RL, Huggett JA, Coetzee JC, van der Lingen CD, et al. 2011. Accommodating dynamic oceanographic processes and pelagic biodiversity in marine conservation planning. PloS One 6: e16552.			27935822	Y	Y	N - Exclude on intervention, outcomes, comparator and study design
Álvarez‐Romero et al., 2013 B	Wheeler M, Chambers FMJ, Sims-Castley R, Cowling RM, Schoeman D. 2008. From beans to breams: how participatory workshops can contribute to marine conservation planning. African Journal of Marine Science 30: 475–487.			27930214	Y	Y	N - Exclude on outcomes, comparator and study design
Álvarez‐Romero et al., 2013 B	Airame S, Dugan JE, Lafferty KD, Leslie H, McArdle DA, Warner RR. 2003. Applying ecological criteria to marine reserve design: a case study from the California Channel Islands. Ecological Applications 13: S170–S184. All JD. 2006. Colorado river floods, droughts, and shrimp			27931212	Y	N
Álvarez‐Romero et al., 2013 B	Allison GW, Gaines SD, Lubchenco J, Possingham HP. 2003. Ensuring persistence of marine reserves: catastrophes require adopting an insurance factor. Ecological Applications 13: 8–24. AlmanyG, Connolly S,Heath D,Hogan J, JonesG,McCook L,			27931213	Y	N
Álvarez‐Romero et al., 2013 B	AlmanyG, Connolly S,Heath D,Hogan J, JonesG,McCook L, Mills M, Pressey R, Williamson D. 2009. Connectivity, biodiversity conservation and the design of marine reserve networks for coral reefs. Coral Reefs 28: 339–351. Alvarez-Romero JG, Pressey RL, Ban NC, Vance-Borland K,			27930071	Y	N
Álvarez‐Romero et al., 2013 B	Alvarez-Romero JG, Pressey RL, Ban NC, Vance-Borland K, Willer C, Klein CJ, Gaines SD. 2011. Integrated land–sea conservation planning: the missing links. Annual Review of Ecology, Evolution, and Systematics 42: 381–409. Ardron JA, Possingham H, Klein C. 2008. Marxan Good			27951187	Y	N
Álvarez‐Romero et al., 2013 B	Ban NC, Klein CJ. 2009. Spatial socioeconomic data as a cost in systematic marine conservation planning. Conservation Letters 2: 206–215. Barbier EB, Hacker SD, Kennedy C, Koch EW, Stier AC, Silliman BR. 2010. The value of estuarine and coastal			27951104	Y	N
Álvarez‐Romero et al., 2013 B	Ban NC. 2009. Minimum data requirements for designing a set of marine protected areas, using commonly available abiotic and biotic datasets. Biodiversity and Conservation 18: 1829–1845. Ban NC, Klein CJ. 2009. Spatial socioeconomic data as a cost			27930059	Y	N
Álvarez‐Romero et al., 2013 B	Bottrill MC, Pressey RL. 2012. The effectiveness and evaluation of conservation planning. Conservation Letters 5: 407–420. 502 J. G. ÁLVAREZ-ROMERO ET AL. Copyright # 2013 John Wiley & Sons, Ltd. Aquatic Conserv: Mar. Freshw. Ecosyst. 23: 483–505 (2013)			27951967	Y	N
Álvarez‐Romero et al., 2013 B	Edwards HJ, Elliott IA, Pressey RL, Mumby PJ. 2010. Incorporating ontogenetic dispersal, ecological processes and conservation zoning into reserve design. Biological Conservation 143: 457–470. Enríquez-Andrade R, Danemann G. 1998. Identificación y			27951214	Y	N
Álvarez‐Romero et al., 2013 B	FoleyM,HalpernB,Micheli F, ArmsbyM, CaldwellM, CrainC, Prahler E, Rohr N, Sivas D, Beck M. 2010. Guiding ecological principles for marine spatial planning. Marine Policy 34: 955–966. Galindo-Reyes JG, Villagrana LC, Lazcano-Alvarez G. 1999.			27929701	Y	N
Álvarez‐Romero et al., 2013 B	Grantham HS, Bode M, McDonald-Madden E, Game ET, Knight AT, Possingham H. 2010. Effective conservation planning requires learning and adaptation. Frontiers in Ecology and the Environment 8: 431–437. Grantham HS, Game ET, Lombard AT, Hobday AJ,			27951120	Y	N
Álvarez‐Romero et al., 2013 B	Green A, Smith SE, Lipsett-Moore G, Groves C, Peterson N, Sheppard S, Lokani P, Hamilton R, Almany J, Aitsi J, Bualia L. 2009. Designing a resilient network of marine protected areas for Kimbe Bay, Papua New Guinea. Oryx 43: 488–498.			27954456	Y	N
Álvarez‐Romero et al., 2013 B	Grober-Dunsmore R, Wooninck L, Field J, Ainsworth C, Beets J, Berkeley S, Bohnsack J, Boulon R, Brodeur R, Brodziak J, et al. 2008. Vertical zoning in marine protected areas: ecological considerations for balancing pelagic fishing with conservation of benthic communities. Fisheries 33:			27930224	Y	N
Álvarez‐Romero et al., 2013 B	Hazlitt SL, Martin TG, Sampson L, Arcese P. 2010. The effects of including marine ecological values in terrestrial reserve planning for a forest-nesting seabird. Biological Conservation 143: 1299–1303. Hidalgo-González RM, Alvarez-Borrego S. 2011. Total and			27929781	Y	N
Álvarez‐Romero et al., 2013 B	Hobday AJ. 2011. Sliding baselines and shuffling species: implications of climate change for marine conservation. Marine Ecology 32: 392–403. Howarth RW. 2008. Coastal nitrogen pollution: a review of sources and trends globally and regionally. Harmful Algae			27969862	Y	N
Álvarez‐Romero et al., 2013 B	Klein C, Steinback C, Scholz A, Possingham H. 2008. Effectiveness of marine reserve networks in representing biodiversity and minimizing impact to fishermen: a comparison of two approaches used in California. Conservation Letters 1: 44–51.			27930370	Y	N
Álvarez‐Romero et al., 2013 B	Klein CJ, Ban NC, Halpern BS, Beger M, Game ET, Grantham HS, Green A, Klein TJ, Kininmonth S, Treml E, et al. 2010. Prioritizing land and sea conservation investments to protect coral reefs. PloS One 5: e12431. Lavín M, Marinone S. 2003. An overview of the physical			27936028	Y	N
Álvarez‐Romero et al., 2013 B	LeslieH, RuckelshausM, Ball IR, Andelman S, PossinghamHP. 2003. Using siting algorithms in the design of marine reserve networks. Ecological Applications 13: S185–S198. Leslie HM. 2005. Synthesis of marine conservation planning approaches. Conservation Biology 19: 1701–1713.			27931218	Y	N
Álvarez‐Romero et al., 2013 B	Lombard AT, Reyers B, Schonegevel LY, Coopers J, Smith-Adao LB, Nel DC, Froneman PW, Ansorge IJ, Bester MN, Tosh CA, et al. 2007. Conserving pattern and process in the Southern Ocean: Designing a marine protected area for the Prince Edward Islands. Antarctic			27930613	Y	N
Álvarez‐Romero et al., 2013 B	McCook L, Ayling T, Cappo M, Choat J, Evans R, De Freitas D, Heupel M, Hughes T, Jones G, Mapstone B, et al. 2010. Adaptive management of the Great Barrier Reef: a globally significant demonstration of the benefits of networks of marine reserves. Proceedings of the			27929660	Y	N
Álvarez‐Romero et al., 2013 B	Pressey RL, Bottrill MC. 2008. Opportunism, threats, and the evolution of systematic conservation planning. Conservation Biology 22: 1340–1345. Pressey RL, Bottrill MC. 2009. Approaches to landscape- and seascape-scale conservation planning: convergence, contrasts			27951043	Y	N
Álvarez‐Romero et al., 2013 B	Pressey RL, Bottrill MC. 2009. Approaches to landscape- and seascape-scale conservation planning: convergence, contrasts and challenges. Oryx 43: 464–475. 504 J. G. ÁLVAREZ-ROMERO ET AL. Copyright # 2013 John Wiley & Sons, Ltd. Aquatic Conserv: Mar. Freshw. Ecosyst. 23: 483–505 (2013)			27929991	Y	N
Álvarez‐Romero et al., 2013 B	Roberts CM, Andelman S, Branch G, Bustamante RH, Castilla JC, Dugan J, Halpern BS, Lafferty KD, Leslie H, Lubchenco J, et al. 2003a. Ecological criteria for evaluating candidate sites for marine reserves. Ecological Applications 13: S199–S214.			27931221	Y	N
Álvarez‐Romero et al., 2013 B	Roberts CM, Branch G, Bustamante RH, Castilla JC, Dugan J, Halpern BS, Lafferty KD, Leslie H, Lubchenco J, McArdle D, et al. 2003b. Application of ecological criteria in selecting marine reserves and developing reserve networks. Ecological Applications 13: 215–228.			27931220	Y	N
Álvarez‐Romero et al., 2013 B	Sala E, Aburto-Oropeza O, Paredes G, Parra I, Barrera JC, Dayton PK. 2002. A general model for designing networks of marine reserves. Science 298: 1991–1993. Sala E, Aburto-Oropeza O, Reza M, Paredes G, López-Lemus LG. 2004. Fishing down coastal food webs in the Gulf of			27938292	Y	N
Álvarez‐Romero et al., 2013 B	Tallis H, Ferdana Z, Gray E. 2008. Linking terrestrial and marine conservation planning and threats analysis. Conservation Biology 22: 120–130. Ulloa R, Torre J, Bourillón L, Gondor A, Alcantar N. 2006. Planeación ecorregional para la conservación marina: Golfo			27951196	Y	N
Álvarez‐Romero et al., 2013 B	Weeks R, Russ GR, Alcala AC, White AT. 2010a. Effectiveness of marine protected areas in the Philippines for biodiversity conservation. Conservation Biology 24: 531–540. Weeks R, Russ GR, Bucol AA, Alcala AC. 2010b. Shortcuts			27929806	Y	N
Álvarez‐Romero et al., 2013 B	Weeks R, Russ GR, Bucol AA, Alcala AC. 2010b. Shortcuts for marine conservation planning: The effectiveness of socioeconomic data surrogates. Biological Conservation 143: 1236–1244. Wheeler M, Chambers FMJ, Sims-Castley R, Cowling RM,			27951301	Y	N
Álvarez‐Romero et al., 2013 B	Wilson KA, Carwardine J, Possingham HP. 2009. Setting conservation priorities. In Year in Ecology and Conservation Biology 2009. Blackwell Publishing: Oxford; 237–264. Wood LJ, Fish L, Laughren J, Pauly D. 2008. Assessing progress towards global marine protection targets: shortfalls			27930207	Y	N
Álvarez‐Romero et al., 2013 B	Wilson KA, Underwood EC, Morrison SA, Klausmeyer KR, Murdoch WW, Reyers B, Wardell-Johnson G, Marquet PA, Rundel PW, McBride MF, et al. 2007. Conserving biodiversity efficiently: what to do, where, and when. PLoS Biology 5: e223.			27930530	Y	N
Álvarez‐Romero et al., 2013 B	Wilson KA, Westphal MI, Possingham HP, Elith J. 2005. Sensitivity of conservation planning to different approaches to using predicted species distribution data. Biological Conservation 122: 99–112. Wilson KA, McBride MF, Bode M, Possingham HP.			27937942	Y	N
Álvarez‐Romero et al., 2013 B	CONABIO. 2007. Analisis de vacios y omisiones en conservacion de la biodiversidad marina de Mexico: oceanos, costas e islas. Comision Nacional para el Conocimiento y Uso de la Biodiversidad (CONABIO); Comision Nacional de Areas Naturales Protegidas; The Nature Conservancy;				Y
Álvarez‐Romero et al., 2013 B	CONANP. 2010. Cobertura de las Áreas Naturales Protegidas Federales y Estatales de México. Comisión Nacional de Áreas Naturales Protegidas, Dirección de Evaluación y Seguimiento, Subdirección Encargada de la Coordinación de Geomática: Mexico, DF.				Y
Álvarez‐Romero et al., 2013 F	Tuda, AO, Stevens, TF, & Rodwell, LD 2014, 'Resolving coastal conflicts using marine spatial planning', Journal of environmental management,, Elsevier		1		Y	Y	N - Exclude on intervention (intervention is similar to, but not SCP), outcomes, comparator and study design			We applied marine spatial planning (MSP) to manage conflicts in a multi-use coastal area of Kenya. MSP involves several steps which were supported by using geographical information systems (GISs), multi-criteria decision analysis (MCDA) and optimization. GIS was used in identifying overlapping coastal uses and mapping conflict hotspots. MCDA was used to incorporate the preferences of user groups …	https://www.researchgate.net/publication/259448532_Resolving_coastal_conflicts_using_marine_spatial_planning
Álvarez‐Romero et al., 2013 F	Torre-Cosio, J 'Red de reservas marinas para la Región de las Grandes Islas, Golfo de California: protocolo del proyecto de planeación y reporte de los talleres del equipo de …', researchgate.net,		1		Y	Y			1		https://www.researchgate.net/publication/311544167_Red_de_reservas_marinas_para_la_Region_de_las_Grandes_Islas_Golfo_de_California_protocolo_del_proyecto_de_planeacion_y_reporte_de_los_talleres_del_equipo_de_planeacion
Álvarez‐Romero et al., 2013 F	Álvarez‐Romero, JG, Munguía‐Vega, A, & ... 2018, 'Designing connected marine reserves in the face of global warming', Global change …,, Wiley Online Library		1		Y	N				Marine reserves are widely used to protect species important for conservation and fisheries and to help maintain ecological processes that sustain their populations, including recruitment and dispersal. Achieving these goals requires well-connected networks of marine reserves that maximize larval connectivity, thus allowing exchanges between populations and recolonization after local disturbances…	http://onlinelibrary.wiley.com/doi/10.1111/gcb.13989/abstract
Álvarez‐Romero et al., 2013 F	Álvarez-Romero, JG, Wilkinson, SN, Pressey, RL, & ... 2014, 'Modeling catchment nutrients and sediment loads to inform regional management of water quality in coastal-marine ecosystems: A comparison of two approaches', Journal of environmental …,, Elsevier		1		Y	N				Human-induced changes in flows of water, nutrients, and sediments have impacts on marine ecosystems. Quantifying these changes to systematically allocate management actions is a priority for many areas worldwide. Modeling nutrient and sediment loads and contributions from subcatchments can inform prioritization of management interventions to mitigate the impacts of land-based pollution on marine …	https://www.ncbi.nlm.nih.gov/pubmed/25173725
Álvarez‐Romero et al., 2013 F	Basurto, X, Blanco, E, Nenadović, M, & Vollan, B 2017, 'Marine Conservation as Complex Cooperative and Competitive Human Interactions', Conservation for the …,, Elsevier		1		Y	N				Globally, marine protected areas (MPAs) are prominent conservation tools. Yet, the understanding of their social effects remains limited. Our multimethod approach relied on lab-in-the-field economic experiments (n = 127) in two MPA and two non-MPA communities in Baja California, Mexico. We also deployed a standardized fishers' survey (n = 544) to verify the external validity of our findings and e…	https://www.sciencedirect.com/science/article/pii/B9780128053751000155
Álvarez‐Romero et al., 2013 F	Gurney, GG 2015, 'Understanding and integrating socioeconomic factors into the design and management of marine protected areas',, Thesis. researchonline.jcu.edu.au		1		Y	N				Marine protected areas (MPAs) are a key strategy employed worldwide to mitigate biodiversity loss and maintain marine ecosystem services. However, the efficacy of MPAs in achieving biological and socioeconomic goals is highly variable; a significant factor impeding their success is a lack of consideration and understanding of associated human systems. This is particularly true for MPAs designed u…	https://researchonline.jcu.edu.au/41255/
Álvarez‐Romero et al., 2013 F	Haupt, PW, Lombard, AT, Goodman, PS, & Harris, JM 2017, 'Accounting for spatiotemporal dynamics in conservation planning for coastal fish in KwaZulu-Natal, South Africa', Biological Conservation,, Elsevier		1		Y	N				Systematic conservation planning methods to design marine protected area (MPA) networks can provide more meaningful results by addressing the spatiotemporal variability of biota, and by using these data to inform target assignment. This study used Marxan software to design candidate MPA networks to meet conservation targets for 67 coastal fish species on the east coast of South Africa. Species we…	https://www.sciencedirect.com/science/article/pii/S0006320717302070
Álvarez‐Romero et al., 2013 F	Mancha-Cisneros, M del Mar, Suárez-Castillo, AN, & ... 2018, 'The role of stakeholder perceptions and institutions for marine reserve efficacy in the Midriff Islands Region, Gulf of California, Mexico', Ocean & Coastal …,, Elsevier		1		Y	N				Governance of marine resources underscores the role of social, economic, and political objectives in achieving conservation outcomes. Marine protected areas, specifically no-take areas (NTAs) where all extractive uses are prohibited, are now widely-used to promote sustainable fisheries and protect marine biodiversity. However, no-take areas have had mixed success, and the governance structures th…	https://www.sciencedirect.com/science/article/pii/S0964569117300017
Álvarez‐Romero et al., 2013 F	Reuter, KE, Juhn, D, & Grantham, HS 2016, 'Integrated land-sea management: recommendations for planning, implementation and management', Environmental conservation,, cambridge.org		1		Y	N				Marine, freshwater and terrestrial ecosystems face increasing anthropogenic threats that are exacerbated by the ecological connectivity between realms; integrated land-sea management (ILSM) is a framework that can help address this connectivity. However, gaps in our knowledge regarding ILSM remain. This study reviewed 108 relevant studies to understand how ILSM is being utilized. Summarized are: …	https://www.cambridge.org/core/journals/environmental-conservation/article/integrated-land-sea-management-recommendations-for-planning-implementation-and-management/50CAFCE72837A4A9F4A343AA30369D52
Álvarez‐Romero et al., 2013 F	Suárez-Castillo, AN, Torre, J, & ... 2016, Communication pathways to integrate fishers in the design of a network of fishery replenishment zones in the Midriff Islands Region, Gulf of California, Ciencia …,, cobi.org.mx		1		Y	N				Unsustainable fishing practices and climate change are some of the principal threats to ocean ecosystems and ecosystem services. Fishery replenishment zones (frz) are instruments that can be used to counteract the negative effects of these threats and reach objectives of fisheries management, biodiversity conservation, climate change adaptation and human wellbeing. In the Midriff Islands Region, …	https://www.gob.mx/cms/uploads/attachment/file/206635/08.pdf
Álvarez‐Romero et al., 2013 F	Basurto, X, Blanco, E, Nenadovic, M, & ... 2016, 'Integrating simultaneous prosocial and antisocial behavior into theories of collective action', Science …,, advances.sciencemag.org		1		N
Álvarez‐Romero et al., 2013 F	Cruz-García, LM, Arreola-Lizárraga, JA, & ... 2015, 'An examination of coastal conservation by remote sensing in Baja California Sur, México', Journal of coastal …,, Springer		1		N
Álvarez‐Romero et al., 2013 F	Hamel, MA, Pressey, RL, Evans, LS, & ... 2018, 'The Importance of Fishing Grounds as Perceived by Local Communities Can be Undervalued by Measures of Socioeconomic Cost Used in Conservation …', Conservation …,, Wiley Online Library		1		N
Álvarez‐Romero et al., 2013 F	Saldaña-Ruiz, LE, Sosa-Nishizaki, O, & Cartamil, D 2017, 'Historical reconstruction of Gulf of California shark fishery landings and species composition, 1939–2014, in a data-poor fishery context', Fisheries Research,, Elsevier		1		N
Álvarez‐Romero et al., 2013 F	Sievanen, L 2014, 'How do small-scale fishers adapt to environmental variability? Lessons from Baja California, Sur, Mexico', Maritime Studies,, Springer		1		N
Álvarez‐Romero et al., 2013 F	Bullimore, B 2014, 'Problems and pressures, management and measures in a site of marine conservation importance: Carmarthen Bay and Estuaries', Estuarine, Coastal and Shelf Science,, Elsevier			27933673	Y	Y	N - Exclude on intervention, outcomes, comparator and study design
Álvarez‐Romero et al., 2013 F	Álvarez-Romero, JG, Pressey, RL, Ban, NC, & Brodie, J 2015, 'Advancing land-sea conservation planning: Integrating modelling of catchments, land-use change, and river plumes to prioritise catchment management and …', PloS one,, journals.plos.org			27932275	Y	N
Álvarez‐Romero et al., 2013 F	COSTERAS, DENCMY, & GERMAIN, N 'FACTIBILIDAD DE LA PESQUERÍA DE ORNATO Y CO-MANEJO SOSTENIBLE EN ÁREAS COSTERAS E INSULARES', biblio.uabcs.mx,				Y
Fisher & Dills, 2012 B	Prendergast JR, Quinn RM, Lawton JH (1999) The gaps between theory and practice in selecting nature reserves. Conserv Biol 13(3): 484–492.		1		Y	Y	N - Exclude on subject, intervention, outcomes, comparator and study design			Over the last three decades a great deal of research, money, and effort have been put into the development of theory and techniques designed to make conservation more efficient. Much of the recent emphasis has been on methods to identify areas of high conservation interest and to design efficient networks of nature reserves. Reserve selection algorithms, gap analysis, and other computerized appro…	https://www.researchgate.net/publication/227705529_The_Gaps_between_Theory_and_Practice_in_Selecting_Nature_Reserves
Fisher & Dills, 2012 B	Davies ZG, Kareiva P, Armsworth PR (2010) Temporal patterns in the size of conservation land transactions. Conserv Lett 3(1): 29–37.		1		Y	N				The full or partial acquisition of land remains a predominant focus of terrestrial conservation strategies. Non-governmental organizations play an important role in habitat protection, yet few studies investigate their contribution to conservation investment. Here we examine temporal trends in the size of land transactions made by the world's largest land trust, The Nature Conservancy (TNC). We c…	http://onlinelibrary.wiley.com/doi/10.1111/j.1755-263X.2009.00091.x/abstract
Fisher & Dills, 2012 B	Fishburn IS, Kareiva P, Gaston KJ, Armsworth PR (2009) The growth of easements as a conservation tool. PLoS One 4(3): e4996. doi:10.1371/ journal.pone.0004996		1		Y	N				Background The numerous studies examining where efforts to conserve biodiversity should be targeted are not matched by comparable research efforts addressing how conservation investments should be structured and what balance of conservation approaches works best in what contexts. An obvious starting point is to examine the past allocation of effort among conservation approaches and how this has e…	http://journals.plos.org/plosone/article?id=10.1371/journal.pone.0004996
Fisher & Dills, 2012 B	Fishburn IS, Kareiva P, Gaston KJ, Evans KL, Armsworth PR (2009) State-level variation in conservation investment by a major nongovernmental organization. Conserv Lett 2(2): 74–81.		1		Y	N				Few empirical studies examine how conservation organizations distribute the resources that they have available for habitat conservation, despite numerous theoretical studies that recommend how these resources should be directed. Here we examine the distribution of conservation investments made over 49 years by a major conservation nongovernmental organization (NGO), The Nature Conservancy (TNC). …	http://onlinelibrary.wiley.com/doi/10.1111/j.1755-263X.2008.00045.x/full
Fisher & Dills, 2012 B	Floberg J, Goering M, Wilhere G, MacDonald C, Chappell C, et al. (2004) Willamette Valley-Puget Trough-Georgia Basin Ecoregional Assessment, Volume One: Report. Available: http://east.tnc.org/east-file/2/WPG_ Ecoregional_Assessment.pdf. Accessed 2012 May 9.		1		Y	N				The report in your hands addresses a pressing need. It is a first approximation of the most important places for conserving native species and ecosystems in the most highly developed region of the Pacific Northwest: the fertile lowlands of Oregon’s Willamette Valley, Washington’s Puget Trough, British Columbia’s Georgia Basin, and the nearshore marine waters of Puget Sound and the Strait of Georg…	Willamette Valley-Puget Trough-Georgia Basin Ecoregional Assessment, Volume One: Report
Fisher & Dills, 2012 B	Knight AT, Grantham HS, Smith RJ, McGregor GK, Possingham HP, et al. (2011) Land managers’ willingness-to-sell defines conservation opportunity for protected area expansion. Biol Cons 144(11): 2623–2630.		1		Y	N				Spatial prioritization techniques are increasingly applied in the design of protected area networks, which are regarded as the cornerstone of nature conservation efforts. These techniques are becoming ever more sophisticated, but are still founded primarily upon biological data. A common assumption made in most spatial prioritizations is that land throughout a planning region is available for acq…	https://www.sciencedirect.com/science/article/pii/S0006320711002667
Fisher & Dills, 2012 B	Soule´ ME, Terborgh J (1999) Conserving nature at regional and continental scales: A scientific program for North America. Bio Science 49(10): 809–817.		1		Y	N				With the closing of the frontier a century ago, visionaries such as John Muir and Theodore Roosevelt sought to ensure the preservation of samples of the most monumental and scenic landscapes of wild America—its grandest vistas and most impressive creatures. As the twentieth century unfolded, however, and as the science of ecology developed, conservation biologists such as Victor Shelford recogniz…	https://academic.oup.com/bioscience/article/49/10/809/222906
Fisher & Dills, 2012 B	The Nature Conservancy (1997) Designing a geography of hope: Guidelines for ecoregion-based conservation in The Nature Conservancy. Arlington: The Nature Conservancy. 84 p.		1		Y	N					http://www.denix.osd.mil/nr/tools/designing-a-geography-of-hope-practitioner-s-handbook-to-ecoregional-conservation-planning-volume-i-and-ii-april-2000-legacy-00-135/
Fisher & Dills, 2012 B	The Nature Conservancy and World Wildlife Fund (2006) Standards for Ecoregional Assessments and Biodiversity Visions. Available: http:// conserveonline.org/docs/2006/02/EA%20Standards%201-26-06.pdf. Accessed 2012 Feb 2.		1		Y	N					https://www.conservationgateway.org/Documents/EA%20Standards%201-26-06.pdf
Fisher & Dills, 2012 B	Underwood EC, Klausmeyer KR, Morrison SA, Bode M, Shaw MR (2009) Evaluating conservation spending for species return: A retrospective analysis in California. Conserv Lett 2(3): 130–137.		1		Y	N				Conservation spending in California, USA exceeds conservation expenditures in many countries. To date, there has been no objective method to assess the efficiency of such spending for achieving species conservation outcomes. We conducted the first such retrospective analysis of conservation spending, examining the distribution of $2.8 billion spent on land protection by the state of California an…	http://onlinelibrary.wiley.com/doi/10.1111/j.1755-263X.2008.00018.x/full
Fisher & Dills, 2012 B	Abell R, Thieme M, Dinerstein E, Olson D (2002) A sourcebook for conducting biological assessments and developing biodiversity visions for ecoregion conservation. Volume 2: Freshwater Ecoregions. Available: http:// conserveonline.org/coldocs/2004/04/FWsourcebook.pdf. Accessed 2012 Feb 2.		1		N
Fisher & Dills, 2012 B	Armsworth PR, Fishburn IS, Davies ZG, Gilbert J, Leaver N, et al. (2012) The size, concentration and growth of biodiversity-conservation nonprofits. Bio Science 62(3): 271–281.		1		N
Fisher & Dills, 2012 B	Dinerstein E, Powell G, Olson D, Wikramanayake E, Abell R, et al. (2000) A workbook for conducting biological assessments and developing biodiversity visions for ecoregion-based conservation. Part 1: Terrestrial Ecoregions. Available: http://conserveonline.org/coldocs/2003/10/13wkbk.pdf. Accessed 2012 Feb 2.		1		N
Fisher & Dills, 2012 B	Haila Y, Margules CR (1996) Survey research in conservation biology. Ecography 19: 323–331.		1		N
Fisher & Dills, 2012 B	Halpern BS, Pyke CR, Fox HE, Haney JC, Schlaepfer MA, et al. (2006) Gaps and mismatches between global conservation priorities and spending. Conserv Biol 20(1): 56–64.		1		N
Fisher & Dills, 2012 B	James A, Gaston KJ, Balmford A (2001) Can we afford to conserve biodiversity? Bioscience 51(1): 43–52.		1		N
Fisher & Dills, 2012 B	Possingham H, Ball I, Andelman S (2000) Mathematical methods for identifying representative reserve networks. In: Ferson S, Burgman M, editors. Quantitative methods for conservation biology. New York: Springer-Verlag. pp. 291–305.		1		N
Fisher & Dills, 2012 B	Pressey RL, Possingham HP, Day JR (1997) Effectiveness of alternative heuristic algorithms for identifying indicative minimum requirements for conservation reserves. Biol Conserv 80: 207–219.		1		N
Fisher & Dills, 2012 B	Short J, Smith A (1994) Mammal decline and recovery in Australia. J Mammal 75(2): 288–297.		1		N
Fisher & Dills, 2012 B	The Conservation Measures Partnership (2004) Open Standards for the Practice of Conservation. Version 1.0. Available: http://www.forest-trends.org/ documents/files/doc_632.pdf. Accessed 2012 Aug 17.		1		N
Fisher & Dills, 2012 B	The Conservation Measures Partnership (2007) Open Standards for the Practice of Conservation. Version 2.0. Available: http://www.conservationmeasures. org/wp-content/uploads/2010/04/CMP_Open_Standards_Version_2.0.pdf. Accessed 2012 Aug 17.		1		N
Fisher & Dills, 2012 B	United States Department of the Interior (2009) Our endangered species program and how it works for landowners. U.S. Fish and Wildlife Service, USDI. Available: http://www.fws.gov/endangered/esa-library/pdf/ landowners.pdf.U.S. Fish and Wildlife Service, USDI. Accessed 2012 May 8.		1		N
Fisher & Dills, 2012 B	van Jaarsveld AS, Freitag S, Chown SL, Muller C, Koch S, et al. (1998) Biodiversity assessment and conservation strategies. Science 279: 2106–2108.		1		N
Fisher & Dills, 2012 B	Bottrill M, Morena M, Pressey R, Game E, Groves C (2012) Evaluating perceived benefits of ecoregional assessments. Conserv Biol In press.	D		33026202	Y	Y	N - Exclude on comparator
Fisher & Dills, 2012 B	Margules CR, Pressey RL (2000) Systematic conservation planning. Nature 405: 243–253.	D		27938573	Y	N
Fisher & Dills, 2012 B	Cowling RM, Pressey RL, Sims-Castley R, le Roux A, Baard E, et al. (2003) The expert or the algorithm?—comparison of priority conservation areas in the Cape Floristic Region identified by park managers and reserve selection software. Biol Cons 112(1–2): 147–167.			27931172	Y	Y	N - Exclude on intervention, outcomes, comparator and study design
Fisher & Dills, 2012 B	Knight AT, Cowling RM, Rouget M, Balmford A, Lombard AT, et al. (2008) Knowing but not doing: selecting priority conservation areas and the research– implementation gap. Conserv Biol 22(3): 610–617.			27936966	Y	Y	N - exclude on intervention, outcomes, comparator and study design
Fisher & Dills, 2012 B	Carwardine J, Wilson KA, Watts M, Etter A, Klein CJ, et al. (2008) Avoiding costly conservation mistakes: the importance of defining actions and costs in spatial priority setting. PLoS ONE 3(7): e2586.doi:10.1371/journal.- pone.0002586			27940058	Y	N
Fisher & Dills, 2012 B	Groves CR, Beck MW, Higgins JV, Saxon EC (2003) Drafting a conservation blueprint: A practitioner’s guide to planning for biodiversity. Washington (DC): Island Press. 457 p.			27970029	Y	N
Fisher & Dills, 2012 B	Groves CR, Valutis L, Vosick D, Neely B, Wheaton K, et al. (2000) Designing a Geography of Hope: a Practitioner’s Handbook for Ecoregional Conservation Planning (Volume 1, Second Edition). Available: http://conserveonline.org/ docs/2000/11/GOH2-v1.pdf. Accessed 2012 Feb 2.			27951055	Y	N
Fisher & Dills, 2012 B	Hayward MW (2011) Using the IUCN Red List to determine effective conservation strategies. Biodivers Conserv 20: 2563–73.			27929283	Y	N
Fisher & Dills, 2012 B	Murdoch W, Polasky S, Wilson KA, Possingham H, Kareiva P, et al. (2007) Maximizing return on investment in conservation. Biol Conserv 139: 375–388.			27930504	Y	N
Fisher & Dills, 2012 B	Williams PH, Araujo MB (2000) Using probability of persistence to identify important areas for biodiversity conservation. Proc R Soc London B 267:1959– 1966			27938557	Y	N
Fisher & Dills, 2012 B	Grantham HS, Wilson KA, Moilanen A, Rebelo T, Possingham HP (2009) Delaying conservation actions for improved knowledge: how long should we wait? Ecol Lett 12(4): 293–301.			27930103	N
Fisher & Dills, 2012 F	McIntosh, EJ, Pressey, RL, Lloyd, S, & ... 2017, 'The Impact of Systematic Conservation Planning', Annual Review of …,, annualreviews.org		1		Y	Y	N - exclude as a review
Fisher & Dills, 2012 F	Carter, SK, Keuler, NS, Pidgeon, AM, & Radeloff, VC 2014, 'Evaluating the influence of conservation plans on land protection actions in Wisconsin, USA', Biological conservation,, Elsevier		1		Y	Y	N - Exclude on intervention (intervention is similar to, but not SCP), outcomes
Fisher & Dills, 2012 F	Baum, J 2016, 'The influence of location on the structure and functioning of private land conservation networks in the Western Cape province of South Africa',, open.uct.ac.za		1		Y	N				Protected areas are an important tool for biodiversity conservation. Statutory protected areas are, however, perceived to currently be insufficient in extent and functioning for achieving conservation goals. Conservation action on privately owned land plays an increasingly vital role in expanding the global conservation estate. Private Land Conservation Areas (PLCAs) exist with internal propertie…	https://open.uct.ac.za/handle/11427/23407
Fisher & Dills, 2012 F	Dudley, N, & Stolton, S 2016, 'Protected area diversity and potential for improvement', Protected Areas: Are They Safeguarding …,, books.google.com		1		Y	N				This chapter explores ways to increase the potential of protected areas by describing the full variety of protected area options, giving examples of how countries are using different approaches to build and maintain their protected area systems, and identifying some gaps in our knowledge and necessary next steps. Together, the management category and governance type provide a clear picture of wha…	http://onlinelibrary.wiley.com/doi/10.1002/9781118338117.ch2/summary
Fisher & Dills, 2012 F	Hemby, TL 2016, 'Exploring the “Where” and the “Why” of Conservation Easements: The Role of Community-level Factors in the Likelihood of Adoption',, vtechworks.lib.vt.edu		1		Y	N				Over the past several decades conservation easements have seen immense growth in their popularity. There are now over 40 million acres of easement land in the United States, up from only 1.4 million in 1998. A significant body of research exists on easements, factors that lead to their adoption, their consequences and effectiveness, and problems that arise from their use, among other topics. Our …	https://vtechworks.lib.vt.edu/handle/10919/73650
Fisher & Dills, 2012 F	Holmes, G 2013, 'What role do private protected areas have in conserving global biodiversity?', SRI working papers,, eprints.whiterose.ac.uk		1		Y	N				This essay explores the role that private protected areas have in conserving biodiversity, by considering their efficacy, the cost of management, their social impacts on neighbouring communities, and their impacts on biodiversity beyond their boundaries. In particular, it considers how private protected areas might differ from protected areas under state, shared or community governance. It finds …	http://citeseerx.ist.psu.edu/viewdoc/download?doi=10.1.1.477.626&rep=rep1&type=pdf
Fisher & Dills, 2012 F	Indrieri, SA, 2013. Land Conservation Organization Strategies concerning Conservation Easements in California. LCO Strategies and Conservation Easements		1		Y	N				Land possesses agricultural, habitat, and production values, which are threatened by development in California and elsewhere. Land Conservation Organizations (LCOs) use conservation easements to protect land from development. LCOs and conservation easements have been increasing since the 1980s despite economic recessions, increased development, and environmental changes. I documented LCO land acq…	https://nature.berkeley.edu/classes/es196/projects/2013final/IndrieriS_2013.pdf
Fisher & Dills, 2012 F	Pegas, F de Vasconcellos, & Castley, JG 2016, 'Private reserves in Brazil: Distribution patterns, logistical challenges, and conservation contributions', Journal for nature conservation,, Elsevier		1		Y	N				Traditional strategies to stem declines in biodiversity include the establishment of public protected area networks. However, private lands are an increasingly important component of contemporary reserve networks. Despite the increasing recognition of the value of private lands for conservation little is known about these areas. Consequently, this study aimed to re-evaluate the changes in private…	https://www.sciencedirect.com/science/article/pii/S1617138115300200
Fisher & Dills, 2012 F	Davis, JB, Webb, E, Kaminski, RM, Barbour, PJ, & ... 2014, 'Comprehensive framework for ecological assessment of the migratory bird habitat initiative following the Deepwater Horizon oil spill', Southeastern …,, BioOne		1		N
Fisher & Dills, 2012 F	Holmes, G 2013, 'SRI PAPERS',, academia.edu		1		N
Fisher & Dills, 2012 F	Larson, ER, Howell, S, Kareiva, P, & ... 2016, 'Constraints of philanthropy on determining the distribution of biodiversity conservation funding', Conservation …,, Wiley Online Library		1		N
Fisher & Dills, 2012 F	Mwakiwa, E, Hearne, JW, Stigter, JD, & ... 2016, 'Optimization of net returns from wildlife consumptive and non-consumptive uses by game reserve management', Environmental …,, cambridge.org		1		N
Fisher & Dills, 2012 F	Peterson, E 2013, 'A Review of Conservation Finance Mechanisms in the North American West',, dukespace.lib.duke.edu		1		N
Fisher & Dills, 2012 F	Fishburn, IS, Boyer, AG, Kareiva, P, Gaston, KJ, & ... 2013, 'Changing spatial patterns of conservation investment by a major land trust', Biological …,, Elsevier			27928689	Y	Y	N - Exclude on intervention and outcomes
Fisher & Dills, 2012 F	Meyer, SR, Beard, K, Cronan, CS, & Lilieholm, RJ 2015, 'An analysis of spatio-temporal landscape patterns for protected areas in northern New England: 1900–2010', Landscape ecology,, Springer			27926766	Y	Y	N - exclude on intervention, outcomes, comparator and study design
Fisher & Dills, 2012 F	Duncan, DH, Kyle, G, Morris, WK, & Smith, FP 2014, 'Public investment does not crowd out private supply of environmental goods on private land', Journal of environmental …,, Elsevier			27927377	Y	N
Fisher & Dills, 2012 F	Kareiva, P, Groves, C, & Marvier, M 2014, 'The evolving linkage between conservation science and practice at The Nature Conservancy', Journal of applied ecology,, Wiley Online Library			27927173	Y	N
Fisher & Dills, 2012 F	Walker, J, Rotella, JJ, Loesch, CR, Renner, RW, & ... 2013, 'An integrated strategy for grassland easement acquisition in the Prairie Pothole Region, USA', Journal of Fish and …,, fwspubs.org			27927560	Y	N
Lagabrielle et al., 2010 B	Ardron,J.A.,Possingham,H.P.,Klein,C.J.(Eds.),2008.MARXANGoodPracticesHandbook. Pacific MarineAnalysisandResearchAssociation,Vancouver,BC,Canada. www.pacmara.org External ReviewVersion,17May2008.Arendt, R.,2003.Linkedlandscapes:creatinggreenwaycorridorsthroughconser-	D	1		Y	N				Marxan is software that delivers decision support for reserve system design. Marxan was initially designed to solve a particular class of reserve design problems known as the minimum set problem (see Box 1.1) where the goal is to achieve some minimum representation of biodiversity features for the smallest possible cost. Marxan helps users to determine the possible contribution of individual area…
Lagabrielle et al., 2010 B	Driver, A. ,Cowling, R., Maze, K., 2003. Planning for Living Landscapes: Perspec-tives and Lessons from South Africa. Cape Town; Botanical Society of South Africa.		1		Y	Y	N - Exclude on subject, intervention, outcomes, comparator and study design			Conservation planning in South Africa has taken strides forward in the last decade, particularly in relation to techniques in conservation assessment, and to closing the gap between planning and implementation. The primary scientific literature on conservation planning documents successes and achievements, but seldom focuses on problems and difficulties, especially with the implementation of cons…	http://www.forest-trends.org/documents/files/doc_600.pdf
Lagabrielle et al., 2010 B	Bourdieu, P., 1987. Chosesdites. Espace social et pouvoir symbolique. EditionsdeMinuit, Paris,pp.147e166.		1		Y	Y			1
Lagabrielle et al., 2010 B	Cowling,R.M., 2005. Maintainingtheresearch-implementationcontinuuminconservation.SocietyforConservationBiologyNewsletter12(4). www.conbio.org/Publications/Newsletter/Archives/2005-;9a-November/v12n4.rtf.		1		Y	Y		1			https://www.researchgate.net/publication/238784995_Maintaining_the_Research_Implementation_Continuum_in_Conservation
Lagabrielle et al., 2010 B	David Daniel, Payet Denis, Botta Aurélie, Lajoie Gilles, Manglou Sébastien, Courdier Remy. 2007.Un couplage de dynamiques comportementales : le modèle DS pour l'aménagement du territoire. In : Systèmes multi-agents : modèles de comportements. Actes des JFSMA'07, 17-19 octobre 2007, Carcassonne (France). Toulouse : Cépaduès, pp. 129-138. ISBN 2-85428-796-7		1		Y	Y		1			http://agritrop.cirad.fr/554208/
Lagabrielle et al., 2010 B	Ferber,J.,Guerin,V.,2003.Lestatutépistémologiquedelasimulation.Lesactesdes10emesjournéesdeRochebrune,85e98.		1		Y	Y		1
Lagabrielle et al., 2010 B	Ferrand,N.,1997.ModèlesMulti-Agentspourl'aideàladécisionetlanégociationen aménagementduterritoire.Ph.D.thesis,UniversitéJ.Fourier,Grenoble.		1		Y	Y		1
Lagabrielle et al., 2010 B	Arendt, R.,2003. Linked landscapes: creating greenway corridors through conservation subdivision design strategies in the north eastern and central United States LandscapeandUrbanPlanning68(2,3),241e269.		1		Y	N				Very broadly conceived, greenways can encompass extensive areas comprising natural and cultural landscapes such as prime farmland and upland habitat, in addition to linear elements such as stream valleys or environmentally sensitive lands which are unfit for development due to wetness, floodability, or steepness. Local land-use regulations can be written and implemented to pre-identify potential …	https://www.sciencedirect.com/science/article/pii/S0169204603001579
Lagabrielle et al., 2010 B	Barreteau, O., Antona, M., D'Aquino, P., Aubert, S., Boissau, S., Bousquet, F., Daré, W., Etienne, M., Page, C.L., Mathevet, R., Trébuil, G., Weber, J., 2003. Our companion modelling approach (Lamodélisation commeoutil d'accompagnement). Journal ofArtificial Societies and Social Simulation 6(2),1. http://jasss.soc.surrey.ac.		1		Y	N				This paper is a charter presenting a scientific posture shared by signatories in the use of simulation tools when dealing with complex systems. This posture is based on a cycling approach, in interaction with field processes, including discussion of assumptions and feedbacks on the field process. Confrontation between field and modelling processes has to be permanent because of openness and uncer…	http://jasss.soc.surrey.ac.uk/6/2/1.html
Lagabrielle et al., 2010 B	Bolte, J.P.,Hulse,D.W.,Gregory,S.V.,Smith,C., 2007. Modeling biocomplexity actors, landscapes and alternative futures. Environmental Modelling & Software 22, 570e579.		1		Y	N				Increasingly, models (and modelers) are being asked to address the interactions between human influences, ecological processes, and landscape dynamics that impact many diverse aspects of managing complex coupled human and natural systems. These systems may be profoundly influenced by human decisions at multiple spatial and temporal scales, and the limitations of traditional process-level ecosyste…	https://www.sciencedirect.com/science/article/pii/S1364815206000296
Lagabrielle et al., 2010 B	Botta, A., Dare,W., Antona,M., et Leclerc,G., 2009. Integration of multi-scalestakes in governance by applying companion modelling to landuse foresight. In: Anderssen,R.S.,Braddock,R.D.,Newham,L.T.H. (Eds.), EighteenthWorldIMACSCongressandMODSIM09InternationalCongressonModellingand		1		Y	N				Decentralization of land use governance creates new challenges for participatory approaches, including the involvement of highly diverse participants and the search for coherence among multiple regulations. In France, the 2000 law of Urban Reform and Solidarity ("Solidarité et Renouvellement Urbain") provides a legal framework to land use decentralization. It requires the planning design process …	http://agritrop.cirad.fr/553667/
Lagabrielle et al., 2010 B	Bousquet, F., Le Page, C., 2004. Multi-agent simulations and ecosystem management: a review. Ecological Modelling 176, 313e332.		1		Y	N				This paper proposes a review of the development and use of multi-agent simulations (MAS) for ecosystem management. The use of this methodology and the associated tools accompanies the shifts in various paradigms on the study of ecological complexity. Behavior and interactions are now key issues for understanding and modeling ecosystem organization, and models are used in a constructivist way. MAS…	https://www.sciencedirect.com/science/article/pii/S0304380004000948
Lagabrielle et al., 2010 B	Bousquet,F.,Barreteau,O.,LePage,C.,Mullon,C.,Weber,J.,1999. An environmental modelling approach. The use of multi-agents simulations. In:Blasco,F.,Weill,A.(Eds.), AdvancesinEnvironmentalandEcologicalModelling. Elsevier,Paris,pp.113e122.		1		Y	N				In the field of sustainable development, the problems of access and use of renewable resources are key issues. Scientists working in this area need to examine the interaction between ecological dynamics and social dynamics. Indeed, for many years, this question was examined either exclusively from the angle of "an ecological system subject to anthropic disturbance" or, alternatively, from the ang…	http://cormas.cirad.fr/pdf/gowith.pdf
Lagabrielle et al., 2010 B	Brown, K., 2003. Three challenges for a real people-centred conservation. Global Ecology & Biogeography 12, 89e92.		1		Y	N				Many commentators attest to a paradigm shift in biodiversity conservation, away from exclusive protected areas towards more people-centred or community-based conservation. This has been referred to as ‘new conservation’. However, new conservation could be thought of as an attempt to re-label and re-package conservation and to ‘get people on board’ existing strategies. According to its critics eve…	http://onlinelibrary.wiley.com/doi/10.1046/j.1466-822X.2003.00327.x/abstract
Lagabrielle et al., 2010 B	Daré W.,FourageC.,GayeI.D.23e29 July2006. Methodological issues arisen from the involvement of sociologists in the Domino project, a companion modelling approach: interests and limits. TheQualityofSocialExistenceinaGlobalisingWorld: XVIWorldCongressofSociology,Durban, SouthAfrica.		1		Y	N				To tackle land use management systems, it is necessary to consider the interactions between the ecosystems and society lived in, and their evolution under external or internal factors (Blandin et al., 2004; Fraser et al., 2003). Management systems are complex because of the multiplicity of interactions between stakeholders, between biological and ecological entities which compose the environment,…	http://agritrop.cirad.fr/544031/1/document_544031.pdf
Lagabrielle et al., 2010 B	Daré, W.,Aubert,S.,Bah,A.,Gaye,I.D.,Fourage,C.,Lajoie,G.,Leclerc,G., 2008. Participation issues in action-research: Lessons from Companion Modeling experiments to support land use management. VertigO 8(2). http://vertigo.revues.org/index5012.html.		1		Y	N				How can scientists help institutions and local stakeholders be more involved in land use and territorial management processes? Decentralization of land use management is far from complete in Senegal and La Réunion Island. Despite exhaustive legislation, local populations remain little involved in the decisions that affect their land. This is partly due to the difficulties in understanding and man…	http://journals.openedition.org/vertigo/5012
Lagabrielle et al., 2010 B	Etienne, M.,LePage,C.,Cohen,M.,2003.AStep-by-stepapproachtobuildinglandmanagement scenariosbasedonmultipleviewpointsonmulti-agentsystemsimulations. JournalofArtificial SocietiesandSocialSimulation6(2),2. http://jasss.soc.surrey.ac.uk/6/2/2.html.		1		Y	N				A multi-agent system was developed to simulate strategies of natural resource management in the Causse Méjan, a limestone plateau dominated by a rare grassland-dominated ecosystem endangered by pine invasion. To stimulate the emergence of alternative long-term management strategies for the sheep farms and the woodlands, contrasting dynamic viewpoints on land resources were designed at different s…	http://jasss.soc.surrey.ac.uk/6/2/2.html
Lagabrielle et al., 2010 B	Lagabrielle, E.,Metzger,P.,Martignac,C.,Lortic,B.,Durieux,L.,2007.Land use trends on Reunion Isladn (1989-2002). M@ppemonde86(2). http://mappemonde.mgm.fr/num14/articles/art07205.pdf.		1		Y	N				Land use trends on Reunion Island (1989-2002).— Reunion Island in the Indian Ocean is experiencing rapid socio-economic change. The spatial component of this change was mapped using Spot images between 1989 and 2002. The change detection method used is a comparison of classifications (maximum likelihood and structural analysis). The results confirm a rapid increase in urban spread, a spatial migr…	https://mappemonde-archive.mgm.fr/num14/articles/art07205.html
Lagabrielle et al., 2010 B	Ligtenberg, A., Wachowicz,M., Bregt,A.K., Beulens,A., Kettenis,D.L., 2004. A design and application of a multi-agent system for simulation of multi-actor spatial planning. Journal of Environmental Management 72, 43e55		1		Y	N				Multi-agent Systems (MAS) offer a conceptual approach to include multi-actor decision making into models of land use change. The main goal is to explore the use of MAS to simulate spatial scenarios based on modelling multi-actor decision-making within a spatial planning process. We demonstrate MAS that consists of agents representing organizations and interest groups involved in an urban allocati…	https://www.ncbi.nlm.nih.gov/pubmed/15246573
Lagabrielle et al., 2010 B	Schreinemachers, P.,Berger,T.,2006.Land-usedecisionsindevelopingcountriesand theirrepresentationinMulti-AgentSystems.JournalofLand-useScience1(1), 29e44.Smit, B.,Wandel,J.,2006.Adaptation,adaptivecapacityandvulnerability.Global		1		Y	N				Recent research on land use and land cover change (LUCC) has put more emphasis on the importance of understanding the decision-making of human actors, especially in developing countries. The quest is now for a new generation of LUCC models with a decision-making component. This paper deals with the question of how to realistically represent decision-making in land use models. Two main agent decis…	https://www.tandfonline.com/doi/abs/10.1080/17474230600605202
Lagabrielle et al., 2010 B	Smith, R.J., 2004. Conservation Land-Use Zoning (CLUZ) Software. Available at: https://anotherbobsmith.wordpress.com/software/cluz/		1		Y	N					https://anotherbobsmith.wordpress.com/software/cluz/
Lagabrielle et al., 2010 B	Souchère,V.,Millair,L.,Echeverria,J.,Bousquet,F.,LePage,C.,Etienne,M.,2010.Co-constructing withstakeholdersarole-playinggametoinitiatecollectivemanagementoferosiverunoffrisksatthewatershedscale.EnvironmentalModelling &Software25(11),1359e1370.		1		Y	N				Erosive runoff is a recurring problem and is a source of sometimes deadly muddy floods in the Pays de Caux (France). The risk results from a conjunction of natural factors and human activity. Efficient actions against runoff in agricultural watersheds are well known. However they are still difficult to implement as they require co-operation between stakeholders. Local actors thus need tools to he…	https://www.sciencedirect.com/science/article/pii/S1364815209000656
Lagabrielle et al., 2010 B	Turton,A.R.,Hattingh,J.,Claassen,M.,Roux,D.J.,Ashton,P.J.,2007.Towardsamodelfor ecosystemgovernance:anintegratedwaterresourcemanagementexample.In: Turton,A.R.,Hattingh,J.,Claassen,M.,Roux,D.J.,Ashton,P.J.(Eds.),Gover-nance asaTrialogue:Government-Society-ScienceinTransition.Springer,		1		Y	N				The concept of governance, and especially good governance, is pivotal to the achievement of Integrated Water Resource Management (IWRM). The concepts of governance used in much of the current literature on IWRM indicate that it is often used in a contradictory way and sometimes used interchangeably with the word government. This chapter proposes a Trialogue Model of governance that is structured …	https://link.springer.com/chapter/10.1007/978-3-540-46266-8_1
Lagabrielle et al., 2010 B	van der Valk, A., 2002. TheDutchplanningexperience. LandscapeandUrbanPlanning 58(2),201e210.		1		Y	N				The Netherlands is densely populated and highly urbanised. Growth management and spatial planning have a long-standing tradition. This article reveals driving forces and new trends in planning. The intricacies of the planning system are interpreted in an institutional and political framework. Decision making by consensus is the dominant planning style in The Netherlands.Notwithstanding, a strict …	https://www.researchgate.net/publication/222326932_The_Dutch_planning_experience
Lagabrielle et al., 2010 B	Venter,A.K.,Breen,M.B.,1998.Partnershipforumframework:participativeframeworkforprotectedareaoutreach.EnvironmentalManagement22(6),803e815.Verburg, P.H.,Schot,P.,Dijst,M.,Veldkamp,A.,2004.Land-usechangemodelling:		1		Y	N				Contemporary trends in natural resource management are reviewed, with specific reference to the shift in conservation management strategies away from law enforcement-based strategies towards strategies aimed at facilitating local community participation in the management of natural resources. This review lays a foundation for the presentation of a conceptual framework, the partnership forum frame…	https://www.ncbi.nlm.nih.gov/pubmed/9732511
Lagabrielle et al., 2010 B	Wallace, K.J., 2003. Confusing means with ends: A manager's reflections on experience in agricultural landscapes of Western Australia. Ecological Management and Restoration 4(1), 23e28.		1		Y	N				Since ‘landcare’ in its modern form began in Australia during the early 1980s, considerable resources have been focused on applying tools and processes, such as community empowerment, regionalization, integrated catchment management, and facilitation and coordination. While these are valuable tools to achieve goals, they are not themselves goals. Unfortunately, they have frequently become ends in…	http://onlinelibrary.wiley.com/doi/10.1046/j.1442-8903.2003.00134.x/abstract
Lagabrielle et al., 2010 B	Acevedo,M.F.,Callicott,J.B.,Monticino,M.,Lyons,D.,Palomino,J.,Rosales,J.,Delgado, L.,Ablan,M.,Davila,J.,Tonella,G.,Ramirez,H.,Vilanova,E.,2007.Models ofnaturalandhumandynamicsinforestlandscapes:cross-siteandcross-culturalsynthesis.Geoforum39(2),846e866.		1		N
Lagabrielle et al., 2010 B	Armitage, D.,Marschke,M.,Plummer,R.,2008.Adaptiveco-managementandtheparadoxoflearning.GlobalEnvironmentalChange18,86e98.Ball, I.R.,Possingham,H.P.,2000.MARXAN(V1.8.2):MarineReserveDesignUsingSpatially ExplicitAnnealing,AManual.		1		N
Lagabrielle et al., 2010 B	Ball, I.R.,Possingham,H.P.,2000.MARXAN(V1.8.2):MarineReserveDesignUsingSpatially ExplicitAnnealing,AManual.Baret, S.,Rouget,M.,Richardson,D.M.,Lavergne,C.,Egoh,D.,Dupont,J.,Strasberg,D.,2006.Currentdistributionandpotentialextantofthemost		1		N
Lagabrielle et al., 2010 B	Baret, S.,Rouget,M.,Richardson,D.M.,Lavergne,C.,Egoh,D.,Dupont,J.,Strasberg,D.,2006.CurrentdistributionandpotentialextantofthemostinvasivealienspeciesonLaRéunion(IndianOcean,MascareneIslands).AustralEcology 31,747e758.		1		N
Lagabrielle et al., 2010 B	Beatley,T.,1989.Environmentalethicsandplanningtheory.JournalofPlanningLiterature4(1),1e32.		1		N
Lagabrielle et al., 2010 B	Cadet, T.,1980.Lavégétationdel'îledeLaRéunion,étudephytoécologiqueetphytosociologique.Ph.D.thesis,Universitéd'AixMarseille.In:Castella,J.C.,Trung,T.N.,Boissau,S.(Eds.),Participatorysimulationofland-usechangesinthe NorthernmountainsofVietnam:thecombineduseofanAgent-Based		1		N
Lagabrielle et al., 2010 B	DépartementdelaRéunion,2006.Cahiersdel'agriculture.Availablefrom: http://www.cg974.fr/images/pdf/agriculture/Les%20Cahiers%20de%20l%27agriculture.pdf.Driver,A.,Cowling,R.,Maze,K.,2003.PlanningforLivingLandscapes:Perspec-		1		N
Lagabrielle et al., 2010 B	Folke, C.,Hahn,T.,Olsson,P.,Norberg,J.,2005.Adaptivegovernanceofsocial-ecological systems.AnnualReviewofEnvironmentandResources30,441e473.		1		N
Lagabrielle et al., 2010 B	Funtowicz,S.,Ravetz,J.R.,1991.Anewscientific methodologyforglobalenviron-mental issues.In:Costanza,R.(Ed.),EcologicalEconomics:TheScienceandManagement ofSustainability.ColumbiaUniversityPress,NewYork,pp.137e152.		1		N
Lagabrielle et al., 2010 B	Gigord,L.,Picot,F.,Shykoff,J.,1999.EffectsofhabitatfragmentationonDombeyaacutangula (Sterculiaceae),anativetreeonLaRéunion(IndianOcean).Bio-logical Conservation88,43e51.Gunderson, L.,Holling,C.S.E.,2002.Panarchy:UnderstandingTransformationsin		1		N
Lagabrielle et al., 2010 B	Gunderson, L.,Holling,C.S.E.,2002.Panarchy:UnderstandingTransformationsinHuman andNaturalSystems.IslandPress,Washington,DC.Holling, C.S.,1987.Simplifyingthecomplex:theparadigmsofecologicalfunctionand structure.EuropeanJournalofOperationalResearch30,139e146.		1		N
Lagabrielle et al., 2010 B	Holling, C.S.,1987.Simplifyingthecomplex:theparadigmsofecologicalfunctionand structure.EuropeanJournalofOperationalResearch30,139e146.		1		N
Lagabrielle et al., 2010 B	INSEE, 2009.Recensementgénéraldelapopulationfrançaise.Availablefrom: www.insee.fr (accessed 21October2009).		1		N
Lagabrielle et al., 2010 B	Jenkins, M.,2003.ProspectsforBiodiversity.Science302(5648),1175e1177.		1		N
Lagabrielle et al., 2010 B	Jiggins, J.,Röling,N.,2002.Adaptivemanagement:potentialandlimitationsforecological governanceofforestsinacontextofnormativepluriformity.In:Oglethorpe, J.A.E.(Ed.),AdaptiveManagement:fromTheorytoPractice.UICN,Gland, Cambridge,pp.15e38.		1		N
Lagabrielle et al., 2010 B	Kirkpatrick,S.,Gelatt,C.,Vecchi,M.,1983.Optimizationbysimulatedannealing.Science 220,671e680.		1		N
Lagabrielle et al., 2010 B	Ludwig, D.,2001.Theeraofmanagementisover.Ecosystems4(8),758e764.		1		N
Lagabrielle et al., 2010 B	Maruani, T.,Amit-Cohen,I.,2007.Openspaceplanningmodels:areviewofapproachesandmethods.LandscapeandUrbanPlanning81,1e13.		1		N
Lagabrielle et al., 2010 B	Mathevet,R.,Bousquet,F.,LePage,C.,Antona,M.,2003.Agent-basedsimulationsofinteractionsbetweenduckpopulation,farmingdecisionsandleasingofhuntingrightsintheCamargue(SouthernFrance).EcologicalModelling165(2,3),107e126.		1		N
Lagabrielle et al., 2010 B	Mittermeier,R.A.,daFonseca,G.A.B.,Hoffman,M.,Pilgrim,J.,Brooks,T.,Gill,P.R.,Mittermeier,C.G.,Lamoreux,J.,2005.HotspotsRevisited:Earth'sBiologicallyRichestandMostEndangeredTerrestrialEcoregions.		1		N
Lagabrielle et al., 2010 B	Oglethorpe, J.A.E.(Ed.),AdaptiveManagement:fromTheorytoPractice.UICN,Gland, Cambridge,pp.15e38.Kirkpatrick,S.,Gelatt,C.,Vecchi,M.,1983.Optimizationbysimulatedannealing.Science 220,671e680.		1		N
Lagabrielle et al., 2010 B	Parker,D.C.,Manson,S.M.,Janssen,M.A.,Hoffmann,M.J.,Deadman,P.,2002.Multi-Agent Systemsforthesimulationofland-useandland-coverchange:areview.Annals oftheAssociationofAmericanGeographers93,314e337.Payet,D.,Courdier,R.,Sébastien,N.,Ralambondrainy,T.,2006.Environmentas		1		N
Lagabrielle et al., 2010 B	Payet,D.,Courdier,R.,Sébastien,N.,Ralambondrainy,T.,2006.Environmentassupport forsimplification, reuseandintegrationofprocessesinspatialMAS.IRI'2006,Hawaii,USA.Payet,D.,David,D.,Sébastien,N.,2007.XELOC:eXtensibleEditingLanguageOf		1		N
Lagabrielle et al., 2010 B	Payet,D.,David,D.,Sébastien,N.,2007.XELOC:eXtensibleEditingLanguageOfConfiguration e to facilitatecomplexsystemsconfiguration editionandreuse.EA2525 LIM/IREMIATechnicalReport.Piaget, J.,1967.LogiqueetConnaissancescientifique.Gallimard,Paris.		1		N
Lagabrielle et al., 2010 B	Piaget, J.,1967. LogiqueetConnaissancescientifique.Gallimard,Paris.		1		N
Lagabrielle et al., 2010 B	Smit, B.,Wandel,J.,2006.Adaptation,adaptivecapacityandvulnerability.GlobalEnvironmentalChange16(3),282e292.Smith, R.J.,2004.ConservationLand-UseZoning(CLUZ)Software.Souchère,V.,Millair,L.,Echeverria,J.,Bousquet,F.,LePage,C.,Etienne,M.,2010.		1		N
Lagabrielle et al., 2010 B	Strasberg,D.,Rouget,M.,Richardson,D.M.,Baret,S.,Dupont,J.,Cowling,R.M.,2005.An assessmentofhabitatdiversity,transformationandthreatstobiodiversityon RéunionIsland(MascareneIslands,IndianOcean)asabasisforconservationplanning. BiodiversityandConservation14(12),3015e3032.		1		N
Lagabrielle et al., 2010 B	Termorshuizen,J.,Opdama,P.,vandenBrink,A.,2007.Incorporatingecologicalsustainability intolandscapeplanning.LandscapeandUrbanPlanning79,374e384.Turton,A.R.,Hattingh,J.,Claassen,M.,Roux,D.J.,Ashton,P.J.,2007.Towardsamodel		1		N
Lagabrielle et al., 2010 B	Vejpas, C.,Bousquet,F.,Naivinit,W.,Trébuil,G.,Srisombat,N.,2005.Participatorymodeling formanagingrainfedlowlandricevarietyandseedsystemsinlowerNortheastThailand:methodologyandpreliminary findings. In:Bousquet,F.,Trébuil,G.,Hardy,B.(Eds.),CompanionModelingandMulti-AgentSystemsfor		1		N
Lagabrielle et al., 2010 B	Verburg, P.H.,Schot,P.,Dijst,M.,Veldkamp,A.,2004.Land-usechangemodelling:currentpracticesandresearchpriorities.GeoJournal61(4),309e324.		1		N
Lagabrielle et al., 2010 B	Wilson, E.O.,Peter,M.,1988.Biodiversity.NationalAcademicPress,Washington,DC.E.		1		N
Lagabrielle et al., 2010 B	Cheke, A.S.,1987.AnecologicalhistoryoftheMascareneIslands,withparticularreferencetoextinctionsandintroductionoflandvertebrates.In:Diamond,A.W.(Ed.), StudiesoftheMascareneIslandsBirds.CambridgeUniversityPress,Cambridge, pp.5e89.		1		N
Lagabrielle et al., 2010 B	Conseil RégionaldelaRéunion,2009.Schémad'AménagementRégionaldeLaRéunion, rapport,vol.2.		1		N
Lagabrielle et al., 2010 B	Margules, C.R.,Pressey,R.L.,2000. Systematic conservation planning. Nature405,243e253.Maruani, T.,Amit-Cohen,I.,2007.Openspaceplanningmodels:areviewofapproachesandmethods.LandscapeandUrbanPlanning81,1e13.	D		27938573	Y	N
Lagabrielle et al., 2010 B	Roberts,C.M.,Mcclean,C.J.,Veron,J.E.N.,Hawkins,J.P.,Allen,G.R.,Mcallister,D.E.,Mittermeier,G.C.,Schueler,F.W.,Spalding,M.,Wells,F.,Vynne,C.,Werner,T.B.,2002.Marinebiodiversityhotspotsandconservationprioritiesfortropicalreefs. Science295(5558),1280e1284.	D		27938411	Y	N
Lagabrielle et al., 2010 B	Lagabrielle, E.,Rouget,M.,Payet,K.,Wistebaar,N.,Durieux,L.,Baret,S.,Lombard,A.,Strasberg,D.,2009.Identifyingandmappingbiodiversityprocessesforconservationplanninginislands:acasestudyinRéunionIsland(WesternIndian Ocean).BiologicalConservation142(7),1523e1535.			27930032	Y	Y	N - exclude on intervention, outcomes, comparator and study design
Lagabrielle et al., 2010 B	Cowling,R.M.,Pressey,R.L.,Rouget,M.,Lombard,A.T.,2003.Aconservationplanfora globalbiodiversityhotspot e the CapeFloristicRegion,SouthAfrica.BiologicalConservation 112(1,2),191e216.David,D.,Payet,D.,Botta,A.,Lajoie,G.,Manglou,S.,Courdier,R.,2007.Uncouplage			27931174	Y	N
Lagabrielle et al., 2010 B	Knight, A.T.,Cowling,R.M.,Campbell,B.M.,2006.Anoperationnalmodelforimplementing conservationaction.ConservationBiology20(2),408e419.			27930789	Y	N
Lagabrielle et al., 2010 B	Lombard, A.T.,Cowling,R.M.,Pressey,R.L.,Rebelo,A.G.,2003.Effectivenessoflandclasses assurrogatesforspeciesinconservationplanningfortheCapeFloristicRegion.BiologicalConservation112(1,2),45e62.			27938211	Y	N
Lagabrielle et al., 2010 B	Sarkar,S.,Margules,C.,2002.Operationalizingbiodiversityforconservationplan-ning. JournalofBiosciences27(4(Suppl.2)),299e308.Schreinemachers, P.,Berger,T.,2006.Land-usedecisionsindevelopingcountriesand theirrepresentationinMulti-AgentSystems.JournalofLand-useScience1			27951012	Y	N
Lagabrielle et al., 2010 B	Moilanen, A.,Kujala,H.,2008.Zonationspatialconservationplanningframeworkand softwarev.2.0.UserManual.Parker,D.C.,Manson,S.M.,Janssen,M.A.,Hoffmann,M.J.,Deadman,P.,2002.Multi-Agent Systemsforthesimulationofland-useandland-coverchange:areview.			27951254	Y
Lagabrielle et al., 2010 F	Lestrelin, G, Augusseau, X, David, D, Bourgoin, J, & ... 2017, 'Collaborative landscape research in Reunion Island: Using spatial modelling and simulation to support territorial foresight and urban planning', Applied geography,, Elsevier	D	1		Y	Y	N - Exclude on intervention, outcomes and comparator			This paper reflects on collaborative landscape research conducted in Reunion Island, an outermost region of the European Union. On this 2,500 km2 tropical island also considered a major international biodiversity hotspot, land-use planners must address important challenges, especially growing population densities and urban sprawl that cause important pressure on agricultural land and natural ecos…	https://www.sciencedirect.com/science/article/pii/S0143622816307317
Lagabrielle et al., 2010 F	Lestrelin, G, Augusseau, X, David, D, Seen, DL, & ... 'Collaborative landscape research in Reunion Island: modelling and'managing boundaries' to foster dialogue and knowledge integration', iale2013.eu,	D	1		Y	Y	N - Exclude on intervention, outcomes and comparator			This paper reflects on collaborative landscape research conducted in Reunion Island, an outermost region of the European Union. On this 2,500 km2 tropical island also considered a major international biodiversity hotspot, land-use planners must address important challenges, especially growing population densities and urban sprawl that cause important pressure on agricultural land and natural ecos…	https://www.sciencedirect.com/science/article/pii/S0143622816307317
Lagabrielle et al., 2010 F	Augros, S, Faipoux, L, Bodin, M, Arnaud, LE, & ... 2017, 'Evidence of anthropogenic habitats colonization by the Réunion day gecko Phelsuma borbonica (Mertens, 1966)(Réunion Island, France): conservation implications', Herpetology …,, biotaxa.org	D	1		N
Lagabrielle et al., 2010 F	Augros, S, Faipoux, L, Bodin, M, Goff, A Le, Sanchez, M, & ... 'Evidence for colonisation of anthropogenic habitats by the Réunion day gecko Phelsuma borbonica (Mertens, 1966)(Réunion Island, France): conservation …', researchgate.net,	D	1		N
Lagabrielle et al., 2010 F	Fernandes, JP, Guiomar, N, Freire, M, & Gil, A 2014, 'Applying an integrated landscape characterization and evaluation tool to small islands (Pico, Azores, Portugal)', Revista de Gestão Costeira …,, redalyc.org		1		Y	N				Each landscape is determined and can be characterised by two types of environmental factors: stable biophysical characteristics and manageable land use patterns. The consideration of both these characterisation domains allows the definition of a homogeneous system of reference (the stable characteristics) with which every possible land use pattern can be compared through the use of common evaluat…	http://www.aprh.pt/rgci/rgci473.html
Lagabrielle et al., 2010 F	David, D, Gangat, Y, Payet, D, & ... 2012, 'Reification of emergent urban areas in a land-use simulation model in Reunion Island', ECAI workshop on …,, halshs.archives-ouvertes.fr		1		N
Lagabrielle et al., 2010 F	Esfandeh, S, Kaboli, M, & Eslami-Andargoli, L 2015, 'A Chronological review on application of MARXAN tool for systematic conservation planning in landscape', International Journal of …,, ijeas.org		1		Y	Y	N - exclude as a review			This paper reviews the major contributions to the systematic conservation planning in landscape with Marxan software throughout a 11-year period from 2005 up to 2015. After surveying many papers in this field, the volume of the existing works is identified and classified. The paper summarizes all of the reviewed papers in two tables. These tables determine the region of study, year of study, sele…	https://www.ijeas.org/download_data/IJEAS0212003.pdf
Lagabrielle et al., 2010 F	Fernandes, JP, Gracinhas, N, Freire, M, SoutoCruz, C, & ... 2013, 'Relevant data and information for a comprehensive conservation planning in small islands',, dspace.uevora.pt		1		Y	Y	N - Exclude on intervention (intervention is similar to, but not SCP), outcomes, study design and comparator			The present report analyses the problematic of conservation planning and management in small central Atlantic islands, developing Conservation planning and management approaches that can bring to this particular context. Particular attention is given to the ways of development of feasible governance systems, particularly trough the development of comprehensible environmental characterization and …	http://dspace.uevora.pt/rdpc/handle/10174/10846
Lagabrielle et al., 2010 F	Bragagnolo, C, Pereira, M, Ng, K, & ... 2016, 'Understanding and mapping local conflicts related to protected areas in small islands: a case study of the Azores archipelago', Island Studies …		1		Y	Y	N - Exclude on intervention, outcomes, comparator and study design			Establishing Protected Areas (PAs) is considered one of the most appropriate ways to conserve nature and cultural landscapes. However, conservation constraints can generate social conflicts, especially at a local level. In small islands (SIs), local conflicts may escalate due to an increase in competition for limited space and resources. Pico island in the Azores Archipelago (Portugal), part of t…	https://www.researchgate.net/publication/301892412_Understanding_and_mapping_local_conflicts_related_to_protected_areas_in_small_islands_A_case_study_of_the_Azores_archipelago
Lagabrielle et al., 2010 F	Doyen, L, Roche, P, & Tichit, M 2016, 'Concepts et formalismes de la durabilité pour la biodiversité et les services écosystémiques', Valeurs de la biodiversité et services …,, cairn.info		1		Y	Y			1
Lagabrielle et al., 2010 F	Bousquet, F, Mathevet, R, & Page, C Le 2014, 'Modélisation d'accompagnement et modèles multi-agents appliqués à la conservation de la biodiversité', Sciences de la …,, researchgate.net		1		Y	Y		1
Lagabrielle et al., 2010 F	IRD, UMREDEV 'Collaborative landscape research in Reunion Island: modelling and 'managing boundaries' to foster dialogue and knowledge integration', iale2013.eu,		1		Y	Y		1
Lagabrielle et al., 2010 F	Allnutt, TF, McClanahan, TR, Andréfouët, S, Baker, M, & ... 2012, 'Comparison of marine spatial planning methods in Madagascar demonstrates value of alternative approaches', PloS one,, journals.plos.org		1		Y	N				The Government of Madagascar plans to increase marine protected area coverage by over one million hectares. To assist this process, we compare four methods for marine spatial planning of Madagascar's west coast. Input data for each method was drawn from the same variables: fishing pressure, exposure to climate change, and biodiversity (habitats, species distributions, biological richness, and bio…	http://journals.plos.org/plosone/article?id=10.1371/journal.pone.0028969
Lagabrielle et al., 2010 F	Augusseau, X, Aulanier, F, Begue, A, Bourgoin, J, & ... 2013, 'Simulation cartographique au service de l'innovation collective', SAGEO'2013,, hal.cirad.fr		1		Y	N				The objective of this paper is to present an approach for experimenting territorial prospective analysis based on spatial modelling. This approach is carried out in the framework of the DESCARTES project which aims at developing a spatial simulation tool to support the design and analysis of different scenarios for land-use allocation in Reunion Island in terms of environmental services. The spat…	http://hal.cirad.fr/cirad-00850243/document
Lagabrielle et al., 2010 F	Barnaud, C, Page, C Le, Dumrongrojwatthana, P, & ... 2013, 'Spatial representations are not neutral: Lessons from a participatory agent-based modelling process in a land-use conflict', … Modelling & Software,, Elsevier		1		Y	N				The objective of this paper is to question the increasingly common choice to build and use spatially explicit models, especially in the case of participatory agent-based modelling processes. The paper draws on a combination of lessons from literature and the case of a companion modelling process conducted in the context of a conflict about land and forest management in Northern Thailand. Using in…	https://www.sciencedirect.com/science/article/pii/S1364815211002799
Lagabrielle et al., 2010 F	Filatova, T, Voinov, A, & Veen, A van der 2011, 'Land market mechanisms for preservation of space for coastal ecosystems: an agent-based analysis', Environmental Modelling & Software,, Elsevier		1		Y	N				This paper presents an agent-based model of a land market, which is used to explore the effects of land taxes on the land use in a coastal zone. The model simulates the emergence of land prices and urban land patterns from bottom-up via interactions of individual agents in a land market. A series of model experiments helps visualize and explore how economic incentives in a land market may influen…	https://www.sciencedirect.com/science/article/pii/S1364815210002136
Lagabrielle et al., 2010 F	Greiner, R, Puig, J, Huchery, C, Collier, N, & ... 2014, 'Scenario modelling to support industry strategic planning and decision making', … Modelling & Software,, Elsevier		1		Y	N				The Pastoral Properties Futures Simulator (PPFS) is a dynamic systems model, developed within a participatory action research partnership with the pastoral industry of Australia's Northern Territory. The model was purpose-built to support the industry's strategic planning capacity in the face of environmental, market and institutional uncertainty. The mediated modelling process sought to maximise…	https://www.sciencedirect.com/science/article/pii/S1364815214000218
Lagabrielle et al., 2010 F	Halbe, J, Reusser, DE, Holtz, G, Haasnoot, M, & ... 2015, 'Lessons for model use in transition research: a survey and comparison with other research areas', … Innovation and Societal …,, Elsevier		1		Y	N				The use of models to study the dynamics of transitions is challenging because of several aspects of transitions, notably complexity, multi-domain and multi-level interactions. These challenges are shared by other research areas that extensively make use of models. In this article we survey experiences and methodological approaches developed in the research areas of social-ecological modeling, int…	https://www.sciencedirect.com/science/article/pii/S2210422414000707
Lagabrielle et al., 2010 F	Jalkanen, J 2016, 'Pääkaupunkiseudun viherrakenteen arvotus Zonation-menetelmällä',, Helsingin yliopisto		1		Y	N				Biotopes and biodiversity within the Metropolitan Area of Helsinki (cities of Helsinki, Espoo, Vantaa and Kauniainen) were prioritized with a spatial conservation prioritization software called Zonation. The aim of the thesis was to examine how different, largely urban or semi-urban, areas supported biodiversity and thus, indirectly, ecosystem services provisioning. Furthermore, the effects of th…	https://helda.helsinki.fi/handle/10138/173794
Lagabrielle et al., 2010 F	Joffre, OM, Bosma, RH, Ligtenberg, A, Ha, TTP, & ... 2015, 'Combining participatory approaches and an agent-based model for better planning shrimp aquaculture', Agricultural …,, Elsevier		1		Y	N				In the Mekong Delta coastal zone, decision makers must weigh trade-offs between sustaining the shrimp sector and thus ensuring economic development, while also promoting sustainable, environmentally friendly practices and planning for climate change adaptation. This study investigates future scenarios for development of shrimp aquaculture using a spatially explicit, agent-based model (ABM) simula…	https://www.sciencedirect.com/science/article/pii/S0308521X15300378
Lagabrielle et al., 2010 F	Keirstead, J, & Shah, N 2013, 'The changing role of optimization in urban planning', Optimization, simulation, and control,, Springer		1		Y	N				Most world cities are now planned in one way or another. Through the deliberate positioning of activity and transportation facilities, urban authorities hope to ensure the success of their cities in economic, social and environmental terms. Urban planning models are an important tool to help them in this task, and in this chapter, we examine the use of optimization techniques in urban planning mo…	https://link.springer.com/chapter/10.1007/978-1-4614-5131-0_11
Lagabrielle et al., 2010 F	Kresge, MW 2011, 'A Comparison of Resource-Centric VS. People-Centric Approaches to Open Space Planning: A Case Study in Jaffrey, NH',, scholarworks.umass.edu		1		Y	N				Land preservation can be an important planning tool when used as part of a strategic and comprehensive vision. This planning process is complicated, however, by the diversity of functions and values associated with open space and the large number of potential stakeholders with an interest in the issue. This project examined alternative ways to approach the development of an open space plan and ob…	https://scholarworks.umass.edu/cgi/viewcontent.cgi?article=1030&context=larp_ms_projects
Lagabrielle et al., 2010 F	Leenhardt, P, Stelzenmüller, V, Pascal, N, Probst, WN, & ... 2017, 'Exploring social-ecological dynamics of a coral reef resource system using participatory modeling and empirical data', Marine Policy,, Elsevier		1		Y	N				Coral reef resource systems are complex adaptive social-ecological systems providing vital and valuable ecosystem services for human societies such as food provision, coastal protection and recreational activities. Their sustainability is questioned in many places around the world as they experience combined effects of multiple chronic anthropogenic and natural drivers at local to global scales. …	https://www.sciencedirect.com/science/article/pii/S0308597X16306108
Lagabrielle et al., 2010 F	Lippe, M, Minh, TT, Neef, A, Hilger, T, Hoffmann, V, & ... 2011, 'Building on qualitative datasets and participatory processes to simulate land use change in a mountain watershed of Northwest Vietnam', … Modelling & Software,, Elsevier		1		Y	N				In this article we investigate if qualitative soil fertility datasets derived during participatory processes can be combined with a corresponding land use change model (i) to improve the understanding of the social-ecological complexity of land use change and (ii) to allow testing of alternative scenarios even in data-poor environments. To test this hypothesis, a participatory assessment approach…	https://www.sciencedirect.com/science/article/pii/S1364815211001708
Lagabrielle et al., 2010 F	Metternicht, G 2018, 'Land Use and Spatial Planning: Enabling Sustainable Management of Land Resources',, books.google.com		1		Y	N				This book reconciles competing and sometimes contradictory forms of land use, while also promoting sustainable land use options. It highlights land use planning, spatial planning, territorial (or regional) planning, and ecosystem-based or environmental land use planning as tools that strengthen land governance. Further, it demonstrates how to use these types of land-use planning to improve econom…	http://www.springer.com/us/book/9783319718606
Lagabrielle et al., 2010 F	Pouwels, R, Opdam, P, & Jochem, R 2011, 'Reconsidering the effectiveness of scientific tools for negotiating local solutions to conflicts between recreation and conservation with stakeholders', Ecology and Society,, ecologyandsociety.org		1		Y	N				The conflict between the conservation of biodiversity and recreation activities in the European landscape is intensifying. Managers of large nature areas are confronted with increasing numbers of visitors and decreasing biodiversity values. To accommodate the visitors while simultaneously protecting the biodiversity values they need to make changes in the landscape. Current legislation, a lack of…	https://www.ecologyandsociety.org/vol16/iss4/art17/
Lagabrielle et al., 2010 F	Qin, W., Zhang, Y. 2013, Research progress on island economy. Progress in Geography 32(9): 1401-1412		1		Y	N				Island is a special regional unit with unique development models and paths. Islands, with their unique locations, resources and environmental advantages, play an important role in the modernization process. Besides being the frontier of the defense of national sovereignty and security, the islands are the important basis to strengthen the marine economy and expand the development space of China. …	http://www.progressingeography.com/CN/10.11820/dlkxjz.2013.09.010
Lagabrielle et al., 2010 F	Seidl, R 2015, 'A functional-dynamic reflection on participatory processes in modeling projects', Ambio,, Springer		1		Y	N				The participation of nonscientists in modeling projects/studies is increasingly employed to fulfill different functions. However, it is not well investigated if and how explicitly these functions and the dynamics of a participatory process are reflected by modeling projects in particular. In this review study, I explore participatory modeling projects from a functional-dynamic process perspective…	https://www.ncbi.nlm.nih.gov/pubmed/25999270
Lagabrielle et al., 2010 F	van Berkel, DB, & Verburg, PH 2012, 'Combining exploratory scenarios and participatory backcasting: using an agent-based model in participatory policy design for a multi-functional landscape', Landscape ecology,, Springer		1		Y	N				While the merits of local participatory policy design are widely recognised, limited use is made of model-based scenario results to inform such stakeholder involvement. In this paper we present the findings of a study using an agent based model to help stakeholders consider, discuss and incorporate spatial and temporal processes in a backcasting exercise for rural development. The study is carrie…	https://link.springer.com/article/10.1007/s10980-012-9730-7
Lagabrielle et al., 2010 F	Whitfield, S, Geist, HJ, & Ioris, AAR 2011, 'Deliberative assessment in complex socioecological systems: recommendations for environmental assessment in drylands', Environmental monitoring and …,, Springer		1		Y	N				Desertification is a complex process, characterised not only by a damaged ecology but also by conflict over access to scarce resources and trade-offs between the needs of multiple stakeholders at multiple scales. As such, orthodox approaches to environmental assessment in drylands, which rely solely on ecological expertise, are gradually losing legitimacy and greater attention is being given to i…	https://link.springer.com/article/10.1007%2Fs10661-011-1933-x
Lagabrielle et al., 2010 F	Xia, Y, Liu, D, Liu, Y, He, J, & Hong, X 2014, 'Alternative zoning scenarios for regional sustainable land use controls in China: A knowledge-based multiobjective optimisation model', International journal of environmental …,, mdpi.com		1		Y	N				Alternative land use zoning scenarios provide guidance for sustainable land use controls. This study focused on an ecologically vulnerable catchment on the Loess Plateau in China, proposed a novel land use zoning model, and generated alternative zoning solutions to satisfy the various requirements of land use stakeholders and managers. This model combined multiple zoning objectives, i.e., maximum…	https://www.ncbi.nlm.nih.gov/pmc/articles/PMC4198994/
Lagabrielle et al., 2010 F	Yu, H, Ni, SJ, Kong, B, He, ZW, Zhang, CJ, & ... 2013, 'Application of scenario analysis and multiagent technique in land-use planning: a case study on Sanjiang wetlands', The Scientific World …,, hindawi.com		1		Y	N				Land-use planning has triggered debates on social and environmental values, in which two key questions will be faced: one is how to see different planning simulation results instantaneously and apply the results back to interactively assist planning work; the other is how to ensure that the planning simulation result is scientific and accurate. To answer these questions, the objective of this pap…	https://www.hindawi.com/journals/tswj/2013/219782/
Lagabrielle et al., 2010 F	Balomenou, N, & Garrod, B 2014, 'Using volunteer-employed photography to inform tourism planning decisions: A study of St David's Peninsula, Wales', Tourism Management,, Elsevier		1		N
Lagabrielle et al., 2010 F	Dedeurwaerdere, T 2014, 'Sustainability science for strong sustainability',, books.google.com		1		N
Lagabrielle et al., 2010 F	Fisher, R, O'Leary, RA, Low-Choy, S, & ... 2012, 'A software tool for elicitation of expert knowledge about species richness or similar counts', … modelling & software,, Elsevier		1		N
Lagabrielle et al., 2010 F	Furlan, A, Poussin, JC, Mailhol, JC, & ... 2012, 'Designing management options to reduce surface runoff and sediment yield with farmers: An experiment in south-western France', Journal of environmental …,, Elsevier		1		N
Lagabrielle et al., 2010 F	Gray, SA, Gray, S, Cox, LJ, & ... 2013, 'Mental modeler: a fuzzy-logic cognitive mapping modeling tool for adaptive environmental management', … Sciences (HICSS), 2013 …,, ieeexplore.ieee.org		1		N
Lagabrielle et al., 2010 F	Haase, D, Haase, A, Kabisch, N, Kabisch, S, & ... 2012, 'Actors and factors in land-use simulation: The challenge of urban shrinkage', … Modelling & Software,, Elsevier		1		N
Lagabrielle et al., 2010 F	Halbe, J, Reusser, DE, Holtz, G, Haasnoot, M, Stosius, A, & ... 2014, 'Environmental Innovation and Societal Transitions',, academia.edu		1		N
Lagabrielle et al., 2010 F	Kemkratoke, K, Thamsenanupap, P, & Noinumsai, N 2012, 'Community Participatory Training Model for the Conservation of Medicinal Plants Biodiversity at Doijedee Mountain Tourist Attraction, Northeastern Thailand', Creative Education,, file.scirp.org		1		N
Lagabrielle et al., 2010 F	Lagabrielle, E, Allibert, A, Kiszka, JJ, Loiseau, N, & ... 2018, 'Environmental and anthropogenic factors affecting the increasing occurrence of shark-human interactions around a fast-developing Indian Ocean island', Scientific Reports,, nature.com		1		N
Lagabrielle et al., 2010 F	Lauf, S, Haase, D, Hostert, P, Lakes, T, & ... 2012, 'Uncovering land-use dynamics driven by human decision-making–A combined model approach using cellular automata and system dynamics', … Modelling & Software,, Elsevier		1		N
Lagabrielle et al., 2010 F	Li, S, Li, X, Liu, X, Wu, Z, Ai, B, & Wang, F 2013, 'Simulation of spatial population dynamics based on labor economics and multi-agent systems: a case study on a rapidly developing manufacturing metropolis', International Journal of …,, Taylor & Francis		1		N
Lagabrielle et al., 2010 F	Lippe, M 2015, 'Simulating the impact of land use change on ecosystem functions in data-limited watersheds of Mountainous Mainland Southeast Asia',, opus.uni-hohenheim.de		1		N
Lagabrielle et al., 2010 F	Nikas, A, Doukas, H, Lieu, J, & ... 2017, 'Managing stakeholder knowledge for the evaluation of innovation systems in the face of climate change', Journal of …,, emeraldinsight.com		1		N
Lagabrielle et al., 2010 F	Ou, G, Tan, S, Zhou, M, Lu, S, Tao, Y, Zhang, Z, & ... 2017, 'An interval chance-constrained fuzzy modeling approach for supporting land-use planning and eco-environment planning at a watershed level', Journal of environmental …,, Elsevier		1		N
Lagabrielle et al., 2010 F	Pérez-Vega, A, Mas, JF, & Ligmann-Zielinska, A 2012, 'Comparing two approaches to land use/cover change modeling and their implications for the assessment of biodiversity loss in a deciduous tropical forest', Environmental Modelling & …,, Elsevier		1		N
Lagabrielle et al., 2010 F	Pijanowski, BC, Tayyebi, A, Doucette, J, Pekin, BK, & ... 2014, 'A big data urban growth simulation at a national scale: configuring the GIS and neural network based land transformation model to run in a high performance …', … Modelling & Software,, Elsevier		1		N
Lagabrielle et al., 2010 F	Polhill, JG, Gimona, A, & Gotts, NM 2013, 'Nonlinearities in biodiversity incentive schemes: a study using an integrated agent-based and metacommunity model', Environmental modelling & software,, Elsevier		1		N
Lagabrielle et al., 2010 F	Roussey, C, Pinet, F, & Schneider, M 2013, 'Representations of Topological Relations Between Simple Regions in Description Logics: From Formalization to Consistency Checking', International Journal of …,, igi-global.com		1		N
Lagabrielle et al., 2010 F	Smajgl, A, & Bohensky, E 2013, 'Behaviour and space in agent-based modelling: poverty patterns in East Kalimantan, Indonesia', Environmental modelling & software,, Elsevier		1		N
Lagabrielle et al., 2010 F	Smajgl, A, & Bohensky, E 2014, 'The Parameterisation of Households in the SimPaSI Model for East Kalimantan, Indonesia', Empirical Agent-Based Modelling-Challenges and …,, Springer		1		N
Lagabrielle et al., 2010 F	Voinov, A, & Bousquet, F 2010, 'Modelling with stakeholders', Environmental Modelling & Software,, Elsevier		1		N
Lagabrielle et al., 2010 F	Weishan, QIN, & Yifeng, Z 'Research progress on island economy', PROGRESS IN GEOGRAPHY,, progressingeography.com		1		N
Lagabrielle et al., 2010 F	Zhang, B 'Wetland Degradation and Ecological Restoration', downloads.hindawi.com,		1		N
Lagabrielle et al., 2010 F	Zhang, H, & Walsh, SJ 2018, 'The Zhoushan Islands, China, and Galapagos Islands, Ecuador: Island Sustainability and Forces of Change',, Elsevier		1		N
Lagabrielle et al., 2010 F	Fernandes, JP, Freire, M, Guiomar, N, & Gil, A 2017, 'Using modeling tools for implementing feasible land use and nature conservation governance systems in small islands–The Pico Island (Azores) case-study', Journal of environmental …,, Elsevier			27931780	Y	Y	N - Exclude on intervention, outcomes, comparator and study design
Lagabrielle et al., 2010 F	Fernandes, JP, Guiomar, N, & Gil, A 2015, 'Strategies for conservation planning and management of terrestrial ecosystems in small islands (exemplified for the Macaronesian islands)', Environmental Science & Policy,, Elsevier			27926765	Y	Y	N - Exclude on intervention, outcomes, comparator and study design
Lagabrielle et al., 2010 F	Lagabrielle, E, Rouget, M, Bourgeois, T Le, & ... 2011, 'Integrating conservation, restoration and land-use planning in islands—An illustrative case study in Réunion Island (Western Indian Ocean)', Landscape and Urban …,, Elsevier			27935704	Y	Y	N - exclude on intervention, outcomes, comparator and study design
Lagabrielle et al., 2010 F	Gordon, A, Langford, WT, Todd, JA, White, MD, & ... 2011, 'Assessing the impacts of biodiversity offset policies', … Modelling & Software,, Elsevier			27929251	Y	N
Lagabrielle et al., 2010 F	Segan, DB, Game, ET, Watts, ME, Stewart, RR, & ... 2011, 'An interoperable decision support tool for conservation planning', … Modelling & Software,, Elsevier			27929250	Y	N
Lagabrielle et al., 2010 F	Treby, DL, Castley, JG, & Hero, JM 2014, 'Forest conservation policy implementation gaps: consequences for the management of hollow-bearing trees in Australia', Conservation and …,, conservationandsociety.org			27934257	N
Lagabrielle et al., 2010 F	Chang-Martínez, LA, & Caussel, JFM 'RECONSTRUCCIÓN DEL CAMBIO DE COBERTURA/USO DEL SUELO DEL REINO DE CALAKMUL PREHISPÁNICO.',				Y

## Sheet: Reasons for exclusion at FT
Bibliographic searches of included studies - results of screening new studies at full-text and reasons for exclusion
Citation origin (B: backwards, F: forwards)	Citation (Author, year, title)	Exclude on subject	Exclude on intervention	Intervention is similar to, but not SCP	Exclude on outcomes	Exclude on comparator	Exclude on study design	Exclude as a review article	Full text unavailable	Full-text not in English
Álvarez‐Romero et al., 2013 B	Arriaga-Cabrera L, Vázquez-Domínguez E, González-Cano J, Jiménez-Rosenberg R, Muñoz-López E, Aguilar-Sierra V. 1998. Regiones marinas prioritarias de México									*
Álvarez‐Romero et al., 2013 B	Bezaury-Creel JE. 2005. Protected areas and coastal and ocean management in México		*		*	*	*
Álvarez‐Romero et al., 2013 B	Enríquez-Andrade R, Anaya-Reyna G, Barrera-Guevara JC, C-M MdlÁ, Martínez-Delgado ME, Vaca-Rodríguez J, Valdés-Casillas C. 2005. An analysis of critical areas for biodiversity conservation in the Gulf of California Region		*		*	*	*
Álvarez‐Romero et al., 2013 B	Enríquez-Andrade R, Danemann G. 1998. Identificación y establecimiento de prioridades para las acciones de conservación y oportunidades de uso sustentable de los recursos marinos y costeros de la Península de Baja California.								*
Álvarez‐Romero et al., 2013 B	Gilliland PM, Laffoley D. 2008. Key elements and steps in the process of developing ecosystem-based marine spatial planning	*	*		*	*	*
Álvarez‐Romero et al., 2013 B	Gleason M, McCreary S, Miller-Henson M, Ugoretz J, Fox E, Merrifield M, McClintock W, Serpa P, Hoffman K. 2010. Science-based and stakeholder-driven marine protected area network planning: a successful case study from north central California		*		*	*	*
Álvarez‐Romero et al., 2013 B	Groves CR, Jensen DB, Valutis LL, Redford KH, Shaffer ML, Scott JM, Baumgartner JV, Higgins JV, Beck MW, Anderson MG. 2002. Planning for biodiversity conservation: Putting conservation science into practice	*	*		*	*	*
Álvarez‐Romero et al., 2013 B	INE. 2005. Evaluacion preliminar de las tasas de perdida de la superficie de manglar en Mexico									*
Álvarez‐Romero et al., 2013 B	Lundquist CJ, Granek EF. 2005. Strategies for successful marine conservation: integrating socioeconomic, political, and scientific factors		*		*	*	*
Álvarez‐Romero et al., 2013 B	Morgan L, Maxwell S, Tsao F, Wilkinson TAC, Etnoyer P. 2005. Marine priority conservation areas: Baja California to the Bering Sea		*		*	*	*
Álvarez‐Romero et al., 2013 B	Pomeroy R, Douvere F. 2008. The engagement of stakeholders in the marine spatial planning process	*	*		*	*	*
Álvarez‐Romero et al., 2013 B	Ulloa R, Torre J, Bourillón L, Gondor A, Alcantar N. 2006. Planeación ecorregional para la conservación marina: Golfo de California y costa occidental de Baja California Sur									*
Álvarez‐Romero et al., 2013 F	Torre-Cosio J. Red de reservas marinas para la Región de las Grandes Islas, Golfo de California: protocolo del proyecto de planeación y reporte de los talleres del equipo de…									*
Álvarez‐Romero et al., 2013 F	Tuda AO, Stevens TF, Rodwell LD. 2014. Resolving coastal conflicts using marine spatial planning		*	*	*	*	*
Fisher & Dills, 2012 B	Prendergast JR, Quinn RM, Lawton JH. 1999. The gaps between theory and practice in selecting nature reserves	*	*		*	*	*
Fisher & Dills, 2012 F	Carter SK, Keuler NS, Pidgeon AM, Radeloff VC. 2014. Evaluating the influence of conservation plans on land protection actions in Wisconsin, USA		*	*	*
Fisher & Dills, 2012 F	McIntosh EJ, Pressey RL, Lloyd S, Smith R, Grenyer R. 2017. The Impact of Systematic Conservation Planning							*
Lagabrielle et al., 2010 B	Bourdieu P. 1987. Chosesdites. Espace social et pouvoir symbolique									*
Lagabrielle et al., 2010 B	Cowling RM. 2005. Maintaining the research-implementation continuum in conservation								*
Lagabrielle et al., 2010 B	David D, Payet D, Botta A, Lajoie G, Manglou S, Courdier R. 2007. Un couplage de dynamiques comportementales: le modèle DS pour l'aménagement du territoire								*
Lagabrielle et al., 2010 B	Driver A, Cowling R, Maze K. 2003. Planning for Living Landscapes: Perspec-tives and Lessons from South Africa	*	*		*	*	*
Lagabrielle et al., 2010 B	Ferber J, Guerin V. 2003. Le statut épistémologique de la simulation								*
Lagabrielle et al., 2010 B	Ferrand N. 1997. Modèles Multi-Agents pour l'aide à la décision et la négociation en a ménagement du territoire								*
Lagabrielle et al., 2010 F	Bousquet F, Mathevet R, Le Page C. 2014. Modélisation d'accompagnement et modèles multi-agents appliqués à la conservation de la biodiversité								*
Lagabrielle et al., 2010 F	Bragagnolo C, Pereira M, Ng K, & ... 2016. Understanding and mapping local conflicts related to protected areas in small islands: a case study of the Azores archipelago		*		*	*	*
Lagabrielle et al., 2010 F	Doyen L, Roche P, Tichit M. 2016. Concepts et formalismes de la durabilité pour la biodiversité et les services écosystémiques									*
Lagabrielle et al., 2010 F	Esfandeh S, Kaboli M, Eslami-Andargoli L. 2015. A Chronological review on application of MARXAN tool for systematic conservation planning in landscape							*
Lagabrielle et al., 2010 F	Fernandes JP, Gracinhas N, Freire M, SoutoCruz C, & ... 2013. Relevant data and information for a comprehensive conservation planning in small islands		*	*	*	*	*
Lagabrielle et al., 2010 F	IRD, UMREDEV Collaborative landscape research in Reunion Island: modelling and 'managing boundaries' to foster dialogue and knowledge integration								*
Lagabrielle et al., 2010 F	Lestrelin G, Augusseau X, David D, Bourgoin J, & ... 2017. Collaborative landscape research in Reunion Island: Using spatial modelling and simulation to support territorial foresight and urban planning		*		*	*
	TOTAL	5	15	3	15	14	13	2	7	6
